# Supplementary material for: Les processuis de formation des anticipations des ménages : une analyse à partir des panels des enquêtes de conjoncture de l'INSEE (1972-1994)
Source: publisher site journal article supplement (doi:10.3762/bjoc.9.204), 1998-01-01

**Supporting information**

**for**

**Zinc–gold cooperative catalysis for the direct  
alkynylation of benzofurans**

Yifan Li<sup>1</sup> and Jérôme Waser\*<sup>1</sup>

Address: <sup>1</sup> Laboratory of Catalysis and Organic Synthesis, Ecole Polytechnique  
Fédérale de Lausanne, EPFL SB ISIC LCSO, BCH4306, 1015 Lausanne,  
Switzerland

Email: Jérôme Waser - [jerome.waser@epfl.ch](mailto:jerome.waser@epfl.ch)

\* Corresponding author

**Experimental part**

## Table of contents

|                                         |     |
|-----------------------------------------|-----|
| 1. General method .....                 | s3  |
| 2. Preparation of reagents .....        | s4  |
| 3. Synthesis of starting material. .... | s4  |
| 4. Alkynylation reactions .....         | s6  |
| 5. Spectra of new compounds.....        | s15 |

## 1. General methods

All reactions were carried out in oven dried glassware under an atmosphere of nitrogen, unless stated otherwise. For quantitative flash chromatography technical grade solvents were used. For flash chromatography for analysis, HPLC grade solvents from Sigma-Aldrich were used. THF, Et<sub>2</sub>O, CH<sub>3</sub>CN, toluene, hexane and CH<sub>2</sub>Cl<sub>2</sub> were dried by passage over activated alumina under nitrogen atmosphere (H<sub>2</sub>O content < 10 ppm, *Karl-Fischer* titration). NEt<sub>3</sub> and pyridine were distilled under nitrogen from KOH. Gold chloride was purchased from Aldrich and kept in a desiccator under anhydrous conditions (decrease of reactivity has been observed for the catalyst if prolonged exposition to air (ca 1 month)). The solvents were degassed by the Freeze-Pump-Thaw method when mentioned. All chemicals were purchased from Acros, Aldrich, Fluka, VWR, Aplichem or Merck and used as such unless stated otherwise. Chromatographic purification was performed as flash chromatography using Macherey-Nagel silica 40–63, 60 Å, using the solvents indicated as eluent with 0.1–0.5 bar pressure. TLC was performed on Merck silica gel 60 F<sub>254</sub> TLC glass plates or aluminium plates and visualized with UV light, permanganate stain, CAN stain or anisaldehyde stain. Melting points were measured on a Büchi B-540 melting point apparatus using open glass capillaries, the data are uncorrected. <sup>1</sup>H NMR spectra were recorded on a Bruker DPX-400 400 MHz spectrometer in chloroform-*d*, DMSO-*d*<sub>6</sub> or CD<sub>3</sub>OD, all signals are reported in ppm with the internal chloroform signal at 7.26 ppm, the internal DMSO signal at 2.50 ppm or the internal methanol signal at 3.30 ppm as standard. The data is being reported as (s = singlet, d = doublet, t = triplet, q = quadruplet, qi = quintet, m = multiplet or unresolved, br = broad signal, app = apparent, coupling constant(s) in Hz, integration, interpretation). <sup>13</sup>C NMR spectra were recorded with <sup>1</sup>H-decoupling on a Bruker DPX-400 100 MHz spectrometer in chloroform-*d*, DMSO-*d*<sub>6</sub> or CD<sub>3</sub>OD, all signals are reported in ppm with the internal chloroform signal at 77.0 ppm, the internal DMSO signal at 39.5 ppm or the internal methanol signal at 49.0 ppm as standard. Infrared spectra were recorded on a JASCO FTIR B4100 spectrophotometer with an ATR PRO410-S and a ZnSe prisma and are reported as cm<sup>-1</sup> (w = weak, m = medium, s = strong, br = broad). Gas chromatographic and low resolution mass spectrometric measurements were performed on a Perkin-Elmer Clarus 600 gas chromatograph and mass spectrometer using a Perkin-Elmer Elite fused silica column (length: 30 m, diameter: 0.32 mm) and helium as carrier gas. High resolution mass spectrometric measurements were performed by the mass spectrometry service of ISIC at the EPFL on a MICROMASS (ESI) Q-TOF Ultima API. HPLC measurement were done on a JASCO HPLC system with an AS2055 Autosampler, a PU 2089 Pump, a UV 2075 detector and a SEDEX 85 (SEDERE) detector using a CHIRALPAK IC column from DAICEL Chemical Industries Ltd. HPLC grade solvents from Sigma-Aldrich were used.

## 2. Preparation of reagents

TIPS-EBX is commercially available, or can be synthesized using a reported procedure.<sup>1</sup>

## 3. Synthesis of starting materials.

### 5-Phenylbenzofuran (7d)

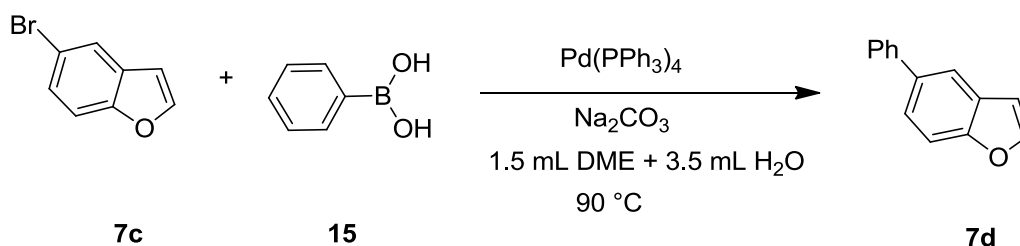

A schlenk tube was charged with boronic acid **15** (152 mg, 1.25 mmol, 1.25 equiv), Pd(PPh<sub>3</sub>)<sub>4</sub> (57.5 mg, 0.0500 mmol, 0.05 equiv), Na<sub>2</sub>CO<sub>3</sub> (265 mg, 2.50 mmol, 2.50 equiv), DME (1.5 mL) and H<sub>2</sub>O (3.5 mL). After degassing the mixture, 5-bromobenzofuran (**7c**) (196 mg, 1.00 mmol, 1.0 equiv) was added. The mixture was heated to 90 °C and stirred overnight under N<sub>2</sub>. Then, the mixture was filtered through a plug of celite, and diluted with CH<sub>2</sub>Cl<sub>2</sub> (10 mL). The organic layer was washed with 1 M NaOH (10 mL), brine (10 mL), dried over MgSO<sub>4</sub> and concentrated under reduced pressure. The crude product was purified by column chromatography (SiO<sub>2</sub>; pentane) to afford **7d** as a white solid (174 mg, 0.900 mmol, 90%).

*R*<sub>f</sub> (pentane): 0.6.

<sup>1</sup>H NMR (400 MHz, CDCl<sub>3</sub>) δ 7.82 (d, 1 H, *J* = 1.4 Hz; *FuranH*), 7.68 (d, 1 H, *J* = 2.2 Hz; *ArH*), 7.65 (dd, 2 H, *J* = 8.5, 1.3 Hz, *ArH*), 7.60 (d, 1 H, *J* = 8.5 Hz; *ArH*), 7.56 (dd, 1 H, *J* = 8.6, 1.3 Hz, *ArH*), 7.48 (t, 2 H, *J* = 7.4 Hz, *ArH*), 7.38 (t, 1H, *J* = 7.4 Hz; *ArH*) 6.84 (d, 1 H, *J* = 1.4 Hz; *FuranH*) <sup>13</sup>C NMR (101 MHz, CDCl<sub>3</sub>) δ 154.5, 145.6, 141.6, 136.4, 128.7, 127.9, 127.4, 126.8, 123.9, 119.7, 111.5, 106.8. The NMR data correspond to the literature.<sup>2</sup>

### 5-Hexylbenzofuran (7e)

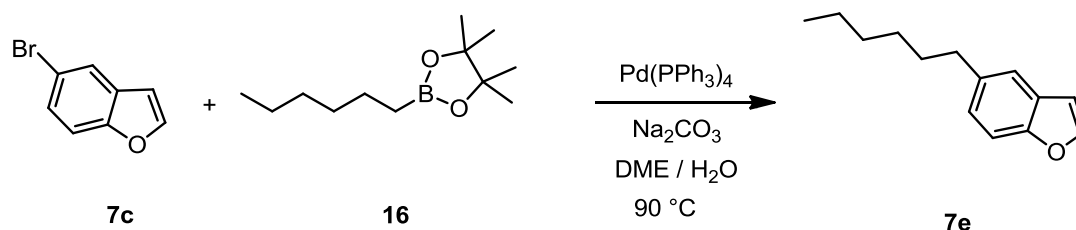

<sup>1</sup> J. P. Brand, J. Waser, *Synthesis* **2012**, 44, 1155.

<sup>2</sup> Varela-Fernandez, A.; Gonzalez-Rodriguez, C.; Varela, J.; Castedo, L.; Saa, C. *Org. Lett.* **2009**, 11, 5350.

A schlenk tube was charged with boronic ester **16** (170 mg, 0.800 mmol, 1.0 equiv), Pd(PPh<sub>3</sub>)<sub>4</sub> (46.2 mg, 0.0500 mmol, 0.05 equiv), Na<sub>2</sub>CO<sub>3</sub> (85 mg, 2.5 mmol, 1.0 equiv), DME (1.0 mL) and H<sub>2</sub>O (2.5 mL). After degassing the mixture, 5-bromobenzofuran (**7c**, 173 mg, 0.880 mmol, 1.1 equiv) was added. The mixture was heated to 90 °C and stirred overnight under N<sub>2</sub>. Then, the mixture was filtered through a plug of celite, and diluted with CH<sub>2</sub>Cl<sub>2</sub> (10 mL). The organic layer was washed with 1 M NaOH (10 mL), brine (10 mL), dried over MgSO<sub>4</sub> and concentrated under reduced pressure. The crude product was purified by column chromatography (SiO<sub>2</sub>; pentane) to afford **7e** as a colorless oil (77 mg, 0.38 mmol, 48%).

*R*<sub>f</sub> (pentane): 0.5.

<sup>1</sup>H NMR (400 MHz, CDCl<sub>3</sub>) δ 7.59 (d, 1 H, *J* = 2.2 Hz, *FuranH*), 7.41 (m, 2 H, *ArH*), 7.12 (dd, 1 H, *J* = 8.4, 1.7 Hz, *ArH*), 6.72 (dd, 1 H, *J* = 2.2, 0.8 Hz, *FuranH*), 2.70 (m, 2 H, *HexylH*), 1.65 (m, 2 H, *HexylH*), 1.40-1.26 (m, 6 H, *HexylH*), 0.90 (t, 3 H, *J* = 7.0 Hz, *HexylH*). <sup>13</sup>C NMR (101 MHz, CDCl<sub>3</sub>) δ 153.4, 144.9, 137.4, 127.4, 124.9, 120.3, 110.8, 106.4, 35.9, 32.1, 31.7, 29.0, 22.6, 14.1. IR 2956 (m), 2928 (s), 2857 (m), 2362 (w), 1697 (w), 1468 (s), 1331 (w), 1263 (m), 1197 (w), 1130 (m), 1113 (w), 1034 (w), 910 (w), 885 (w), 810 (m), 764 (m), 737 (s). Anal. calcd. for C<sub>14</sub>H<sub>18</sub>O: C, 83.12%; H, 8.97%. Found: C, 83.24%; H, 8.89%.

### 7-Phenylbenzofuran (**7g**)

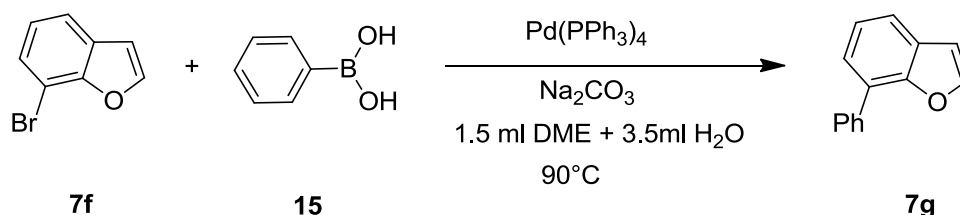

A schlenk tube was charged with boronic acid **15** (89 mg, 0.73 mmol, 1.0 equiv), Pd(PPh<sub>3</sub>)<sub>4</sub> (42 mg, 0.050 mmol, 0.05 equiv), Na<sub>2</sub>CO<sub>3</sub> (77 mg, 0.73 mmol, 1.0 equiv), DME (1.0 mL) and H<sub>2</sub>O (2.5 mL). After degassing the mixture, 7-bromobenzofuran (**7f**, 158 mg, 0.880 mmol, 1.1 equiv) was added. The mixture was heated to 90 °C and stirred overnight under N<sub>2</sub>. Then, the mixture was filtered through a plug of celite, and diluted with CH<sub>2</sub>Cl<sub>2</sub> (10 mL). The organic layer was washed with 1 M NaOH (10 mL), brine (10 mL), dried over MgSO<sub>4</sub> and concentrated under reduced pressure. The crude product was purified by column chromatography (SiO<sub>2</sub>; pentane) to afford **7g** as a colorless oil (126 mg, 0.649 mmol, 89%).

*R*<sub>f</sub> (pentane): 0.3.

<sup>1</sup>H NMR (400 MHz, CDCl<sub>3</sub>) δ 7.92 (m, 2 H, *ArH*), 7.72 (d, 1 H, *J* = 2.2 Hz, *FuranH*), 7.63 (dd, 1 H, *J* = 7.7, 1.1 Hz, *ArH*), 7.55 (m, 2 H, *ArH*), 7.51 (dd, 1 H, *J* = 7.5, 1.1 Hz, *ArH*), 7.44 (m, 1 H, *ArH*), 7.37 (m, 1 H, *ArH*), 6.87 (d, 1 H, *J* = 2.2 Hz, *FuranH*). <sup>13</sup>C NMR (101 MHz, CDCl<sub>3</sub>) δ 152.2, 145.0, 136.5, 128.6, 128.5, 128.1, 127.6, 125.6, 123.8, 123.3, 120.4, 106.7. The NMR data corresponds to the literature.<sup>3</sup>

<sup>3</sup> Otterlo, W.; Morgans, G.; Lee, M.; Kuzvidza, S.; Moleele, S.; Thornton, N.; Koning, C. T, Teth, *Tetrahedron*, **2005**, *61*, 7746.

## 4. Alkynylation Reactions

### Optimization of the reaction:

#### General procedure:

TIPS-EBX (**8**), AuCl (2.3 mg, 0.010 mmol, 0.050 equiv) and additives were added into a solution of benzofuran (**7a**, 23.6 mg 0.200 mmol, 1.0 equiv) in CH<sub>3</sub>CN under air. Then the mixture was concentrated with silica gel and purified by column chromatography directly.

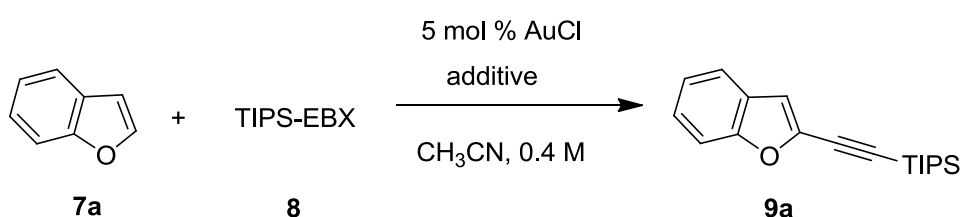

| Equiv of TIPS-EBX ( <b>8</b> ) | Additive                                      | Temp (°C)  | Yield (%) |
|--------------------------------|-----------------------------------------------|------------|-----------|
| 1.2                            | -                                             | rt         | 0         |
| 1.2                            | -                                             | 60         | 0         |
| 1.2                            | 1.2equiv Zn(OTf) <sub>2</sub>                 | rt         | 22        |
| 1.2                            | 1.2equiv Zn(OTf) <sub>2</sub>                 | 60         | 56        |
| 1.2                            | 1.2equiv Zn(OTf) <sub>2</sub>                 | 40         | 48        |
| 1.2                            | 1.2equiv Zn(OTf) <sub>2</sub>                 | reflux     | 34        |
| 2                              | 2.0equiv Zn(OTf) <sub>2</sub>                 | 60         | 75        |
| 2                              | 2.0equiv Zn(OTf) <sub>2</sub>                 | 60 (0.1 M) | 34        |
| 2                              | 2.0equiv Zn(OTf) <sub>2</sub>                 | 60 (0.8 M) | 68        |
| 2                              | 2.0equiv TFA                                  | 60         | 34        |
| 2                              | 2.0equiv Zn(BF <sub>4</sub> ) <sub>2</sub>    | 60         | 0         |
| 2                              | 0.2equiv Zn(OTf) <sub>2</sub>                 | 60         | 37        |
| 2                              | 4.0 equiv Zn(OTf) <sub>2</sub>                | 60         | 0         |
| 2                              | 2.0equiv Zn(NTf <sub>2</sub> ) <sub>2</sub>   | 60         | 57        |
| 2                              | 2.0equiv Yb(OTf) <sub>3</sub>                 | 60         | 62        |
| 2                              | 2.0equiv Zn(CF <sub>3</sub> COO) <sub>2</sub> | 60         | 17        |
| 2                              | 2.0equiv ZnBr <sub>2</sub>                    | 60         | trace     |
| 2                              | 2.0equiv Zn(CH <sub>3</sub> COO) <sub>2</sub> | 60         | 9         |

**General procedure (GP):** TIPS-EBX (**8**, 342 mg, 0.800 mmol, 2.0 equiv), AuCl (4.6 mg, 0.020 mmol, 0.050 equiv), Zn(OTf)<sub>2</sub> (289 mg, 0.800 mmol, 2.0 equiv) and benzofuran derivatives **7** (0.40 mmol, 1.0 equiv) were added into CH<sub>3</sub>CN (2.0 mL) under air. The mixture was stirred for 26 hours at 60 °C. Then the mixture was concentrated with silica gel and purified by column chromatography directly.

**(Benzofuran-2-ylethynyl)triisopropylsilane (9a)**

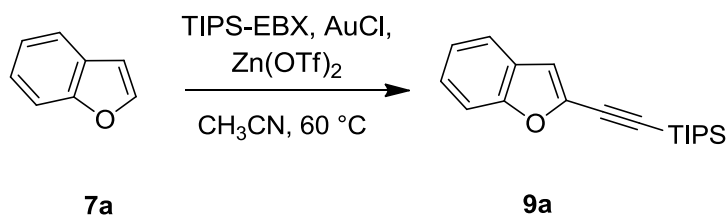

Following the conditions described in **GP**, the crude product was purified by flash column chromatography (SiO<sub>2</sub>; pentane) to afford **9a** as a yellow oil (90 mg, 0.30 mmol, 75%).

*R<sub>f</sub>* (pentane): 0.6.

<sup>1</sup>H NMR (400 MHz, CDCl<sub>3</sub>) δ 7.54 (d, 1 H, *J* = 7.8 Hz, *ArH*), 7.45 (m, 1 H, *ArH*), 7.33 (m, 1 H, *ArH*), 7.21 (m, 1 H, *ArH*), 6.95 (s, 1 H, *FuranH*), 1.15 (m, 21 H, *TIPS*); <sup>13</sup>C NMR (101 MHz, CDCl<sub>3</sub>) δ 154.6, 138.7, 127.5, 125.6, 123.2, 121.2, 111.9, 111.2, 98.7, 96.2, 18.6, 11.2; IR 2943 (s), 2865 (s), 2155 (w), 2154 (w), 1558 (w), 1490 (w), 1463 (m), 1449 (m), 1261 (w), 1181 (m), 1019 (w), 997 (m), 952 (w), 922 (w), 884 (s), 818 (w), 809 (w). HRMS (ESI) calcd for C<sub>19</sub>H<sub>26</sub>OSi[M]<sup>+</sup> 298.1753; found 298.1749.

**Triisopropyl((5-methoxybenzofuran-2-yl)ethynyl)silane (9b)**

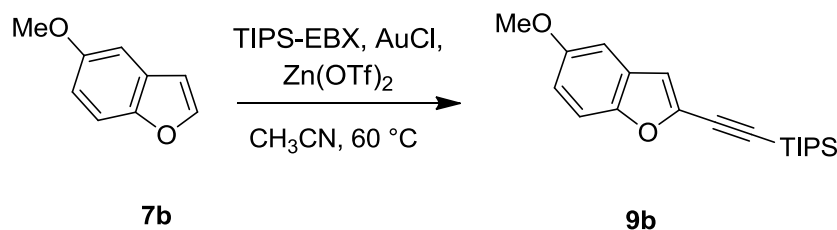

Following the conditions described in **GP**, the crude product was purified by flash column chromatography (SiO<sub>2</sub>; Pentane/DCM 100/1) to afford **9b** as a yellow oil (96 mg, 0.29 mmol, 73%).

*R<sub>f</sub>* (pentane/DCM 100/1): 0.2.

<sup>1</sup>H NMR (400 MHz, CDCl<sub>3</sub>) δ 7.33 (d, 1 H, *J* = 8.8 Hz, *ArH*), 6.97 (d, 1 H, *J* = 2.5 Hz, *ArH*), 6.93 (dd, 1 H, *J* = 8.9, 2.6 Hz, *ArH*), 6.89 (s, 1 H, *FuranH*), 3.84 (s, 3 H, *CH<sub>3</sub>*), 1.14 (m, 21 H, *TIPS*); <sup>13</sup>C NMR (151 MHz, CDCl<sub>3</sub>) δ 156.2, 149.6, 139.4, 128.0, 114.7, 112.0, 111.7, 103.0, 98.5, 96.3, 55.8, 18.6, 11.2; IR 2946 (s), 2945 (s), 2866 (m), 2363 (w), 2156 (w), 1617 (w), 1470 (s), 1299 (w), 1254 (w), 1210 (s), 1184 (m), 1032 (w), 997 (w), 956 (w), 883 (w). HRMS (ESI) calcd for C<sub>20</sub>H<sub>29</sub>O<sub>2</sub>Si<sup>+</sup> [M+H]<sup>+</sup> 329.1931; found 329.1917.

**((5-Bromobenzofuran-2-yl)ethynyl)triisopropylsilane (9c)**

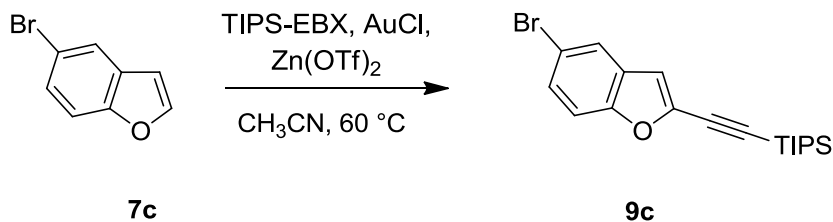

Following the conditions described in **GP**, the crude product was purified by flash column chromatography (SiO<sub>2</sub>; pentane) to afford **9c** as a yellow oil (96 mg, 0.26 mmol, 64%).

*R*<sub>f</sub> (pentane): 0.7.

<sup>1</sup>H NMR (400 MHz, CDCl<sub>3</sub>) δ 7.67 (d, 1 H, *J* = 1.9 Hz, *ArH*), 7.41 (dd, 1 H, *J* = 8.7, 1.9 Hz, *ArH*), 7.31 (d, 1 H, *J* = 8.7 Hz, *ArH*), 6.88 (s, 1 H, *FuranH*), 1.15 (m, 21 H, *TIPS*); <sup>13</sup>C NMR (151 MHz, CDCl<sub>3</sub>) δ 153.3, 139.9, 129.5, 128.5, 123.7, 116.3, 112.7, 111.1, 99.7, 95.6, 18.6, 11.2; IR 2945 (s), 2866 (s), 2362 (m), 2337 (w), 2159 (w), 1458 (s), 1321 (w), 1258 (w), 1206 (w), 1180 (s), 1070 (w), 1057 (w), 1015 (w), 997 (w), 952 (w), 881 (m). HRMS (ESI) calcd for C<sub>38</sub>Br<sub>2</sub>H<sub>51</sub>O<sub>2</sub>Si<sub>2</sub><sup>+</sup> [M]<sup>+</sup> 753.1789; found 753.1802.

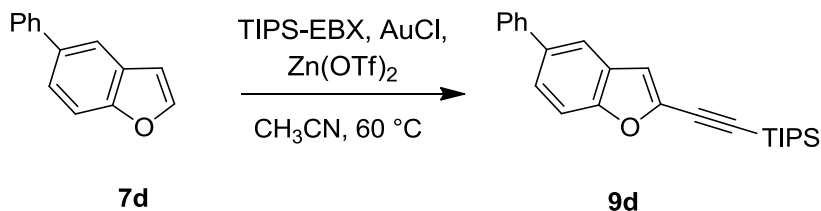

Following the conditions described in **GP**, the crude product was purified by flash column chromatography (SiO<sub>2</sub>; pentane/Et<sub>2</sub>O 100/1) to afford **9d** as a colorless oil (106 mg, 0.290 mmol, 72%).

*R*<sub>f</sub> (pentane/Et<sub>2</sub>O 100/1): 0.7.

<sup>1</sup>H NMR (400 MHz, CDCl<sub>3</sub>) δ 7.72 (dd, 1 H, *J* = 1.8, 0.6 Hz, *ArH*), 7.60 (m, 2 H, *ArH*), 7.56 (dd, 1 H, *J* = 8.6, 1.9 Hz, *ArH*), 7.47 (m, 3 H, *ArH*), 7.34 (m, 1 H, *ArH*), 6.99 (d, 1 H, *J* = 0.9 Hz, *FuranH*), 1.17 (m, 21 H, *TIPS*); <sup>13</sup>C NMR (101 MHz, CDCl<sub>3</sub>) δ 154.2, 141.3, 139.3, 136.9, 128.8, 128.1, 127.4, 127.0, 125.4, 119.5, 112.1, 111.3, 98.9, 96.1, 18.6, 11.2; IR 2945 (s), 2866 (s), 2363 (w), 2158 (w), 1462 (s), 1257 (w), 1240 (w), 1179 (m), 1073 (w), 1015 (w), 998 (w), 954 (w), 884 (m), 814 (w). HRMS (ESI) calcd for C<sub>25</sub>H<sub>30</sub>OSi [M]<sup>+</sup> 374.2066; found . 374.2057.



**((5-Hexylbenzofuran-2-yl)ethynyl)triisopropylsilane (9e)**

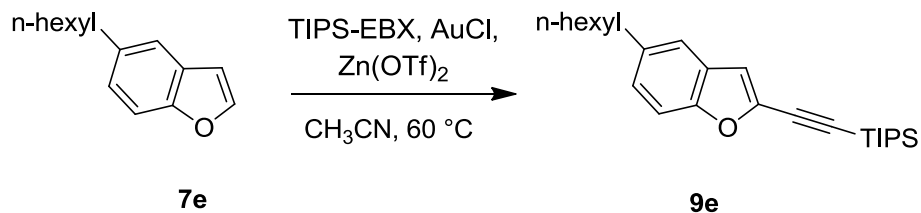

Following the conditions described in **GP**, the crude product was purified by flash column chromatography (SiO<sub>2</sub>; pentane) to afford **9e** as a colorless oil (77 mg, 0.20 mmol, 50%).

*R*<sub>f</sub> (pentane): 0.6.

<sup>1</sup>H NMR (400 MHz, CDCl<sub>3</sub>) δ 7.34 (d, 1 H, *J* = 8.4, *ArH*), 7.32 (d, 1 H, *J* = 0.9 Hz, *ArH*), 7.14 (dd, 1 H, *J* = 8.4, 1.7 Hz, *ArH*), 6.89 (d, 1 H, *J* = 0.9 Hz, *FuranH*), 2.67 (t, 2 H, *J* = 7.5 Hz, *HexylH*), 1.63 (m, 2 H, *HexylH*), 1.36-1.26 (m, 6 H, *HexylH*), 1.14 (m, 21 H, *TIPS*), 0.88 (t, 3 H, *J* = 6.8 Hz, *HexylH*); <sup>13</sup>C NMR (101 MHz, CDCl<sub>3</sub>) δ 153.2, 138.7, 137.9, 127.5, 126.4, 120.2, 111.8, 110.7, 98.3, 96.4, 35.8, 32.0, 31.7, 28.9, 22.6, 18.6, 14.1, 11.2. IR 2946 (m), 2868 (m), 2361 (s), 2157 (w), 2114 (w), 1758 (w), 1727 (w), 1467 (w), 1264 (w), 1233 (w), 1195 (w), 995 (w), 884 (w), 812 (w), 729 (m). HRMS (ESI) calcd for C<sub>25</sub>H<sub>39</sub>OSi<sup>+</sup> [M+H]<sup>+</sup> 383.2765; found 383.2782.

**((7-Bromobenzofuran-2-yl)ethynyl)triisopropylsilane (9f)**

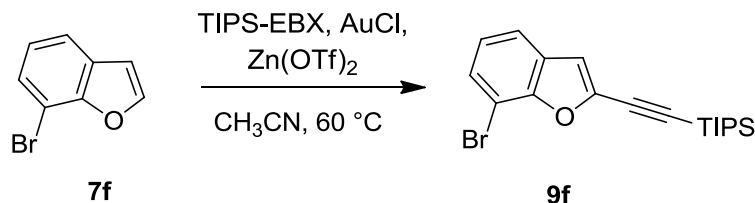

Following the conditions described in **GP**, the crude product was purified by flash column chromatography (SiO<sub>2</sub>; Pentane) to afford **9f** as a colorless oil (119 mg, 0.316 mmol, 79%).

*R*<sub>f</sub> (pentane): 0.4.

<sup>1</sup>H NMR (400 MHz, CDCl<sub>3</sub>) δ 7.49 (dd, *J* = 4.9, 1.0 Hz, *ArH*), 7.47 (dd, 1 H, *J* = 4.9, 1.0 Hz, *ArH*), 7.11 (t, 1 H, *J* = 7.8 Hz, *ArH*), 7.00 (s, 1 H, *FuranH*), 1.19 (m, 21 H, *TIPS*). <sup>13</sup>C NMR (101 MHz, CDCl<sub>3</sub>) δ 151.7, 139.5, 128.8, 128.5, 124.5, 120.2, 112.6, 103.9, 99.9, 95.5, 18.6, 11.2. IR 2945 (m), 2866 (m), 2361 (w), 2158 (w), 1579 (w), 1465 (w), 1417 (w), 1304 (w), 1223 (w), 1176 (m), 1137 (w), 1018 (w), 927 (m), 912 (w), 884 (w), 815 (w), 769 (w), 737 (s). HRMS (ESI) calcd for C<sub>38</sub>Br<sub>2</sub>H<sub>51</sub>O<sub>2</sub>Si<sub>2</sub><sup>+</sup> [2M+H]<sup>+</sup> 753.1789; found 753.1825.

### Triisopropyl((7-phenylbenzofuran-2-yl)ethynyl)silane (**9g**)

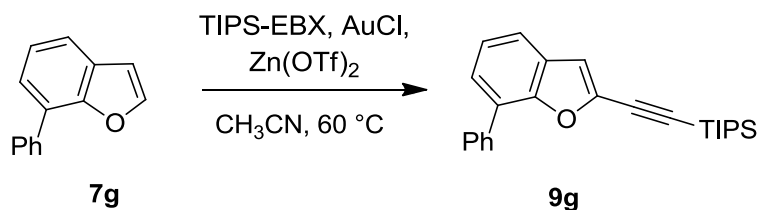

Following the conditions described in **GP**, the crude product was purified by flash column chromatography (SiO<sub>2</sub>; Pentane) to afford **9g** as a colorless oil (98 mg, 0.26 mmol, 65%).

*R*<sub>f</sub> (pentane): 0.3.

<sup>1</sup>H NMR (400 MHz, CDCl<sub>3</sub>) δ 7.87 (m, 2 H, *ArH*), 7.50 (m, 4 H, *ArH*), 7.40 (m, 1 H, *ArH*), 7.32 (t, 1 H, *J* = 7.6 Hz, *ArH*), 7.02 (s, 1 H, *FuranH*), 1.16 (m, 21 H, *TIPS*). <sup>13</sup>C NMR (101 MHz, CDCl<sub>3</sub>) δ 151.8, 138.9, 136.2, 128.7, 128.6, 128.4, 127.7, 125.4, 125.1, 123.8, 120.2, 112.3, 98.8, 96.3, 18.6, 11.2. IR 2945 (s), 2892 (w), 2866 (s), 2361 (s), 2156 (w), 1730 (w), 1685 (w), 1564 (w), 1465 (m), 1409 (w), 1249 (w), 1210 (m), 1171 (w), 1017 (w), 998 (w), 956 (w), 912 (w), 884 (m), 820 (w), 757 (s). HRMS (ESI) calcd for C<sub>25</sub>H<sub>31</sub>OSi<sup>+</sup> [M+H]<sup>+</sup> 375.2139; found 375.2142.

### Triisopropyl((3-methylbenzofuran-2-yl)ethynyl)silane (**9h**)

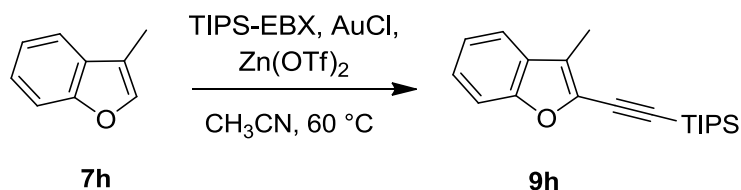

Following a slightly modified version of **GP**, TIPS-EBX (**8**) (514 mg, 1.20 mmol, 3.0 equiv) and Zn(OTf)<sub>2</sub> (434 mg, 1.20 mmol, 3.0 equiv) were used. The crude product was purified by flash column chromatography (SiO<sub>2</sub>; pentane) to afford **9h** as a colorless oil (72 mg, 0.23 mmol, 58%).

*R*<sub>f</sub> (pentane): 0.5.

<sup>1</sup>H NMR (400 MHz, CDCl<sub>3</sub>) δ 7.52 (d, 1 H, *J* = 7.7 Hz *ArH*), 7.45 (d, 1 H, *J* = 8.0 Hz *ArH*), 7.36 (t, 1 H, *J* = 8.0 Hz *ArH*), 7.29 (d, 1 H, *J* = 9.0 Hz *ArH*), 2.37 (s, 3 H, *CH*<sub>3</sub>), 1.19 (m, 21 H, *TIPS*); <sup>13</sup>C NMR (101 MHz, CDCl<sub>3</sub>) δ 154.1, 136.0, 128.7, 125.6, 122.7, 121.9, 119.6, 111.2, 100.8, 95.8, 18.6, 11.2, 8.9; IR 2943 (m), 2865 (m), 2154 (w), 1745 (w), 1463 (m), 1449 (s), 1387 (w), 1353 (w), 1281 (w), 1250 (w), 1191 (s), 1116 (w), 1096 (m), 1071 (w), 1017 (w), 997 (w), 920 (w), 883 (s). HRMS (ESI) calcd for C<sub>20</sub>H<sub>29</sub>OSi<sup>+</sup> [M+H]<sup>+</sup> 313.1982; found 313.1981.

**Triisopropyl((7-methoxybenzofuran-4-yl)ethynyl)silane (9j) + triisopropyl((7-methoxybenzofuran-6-yl)ethynyl)silane (9j')**

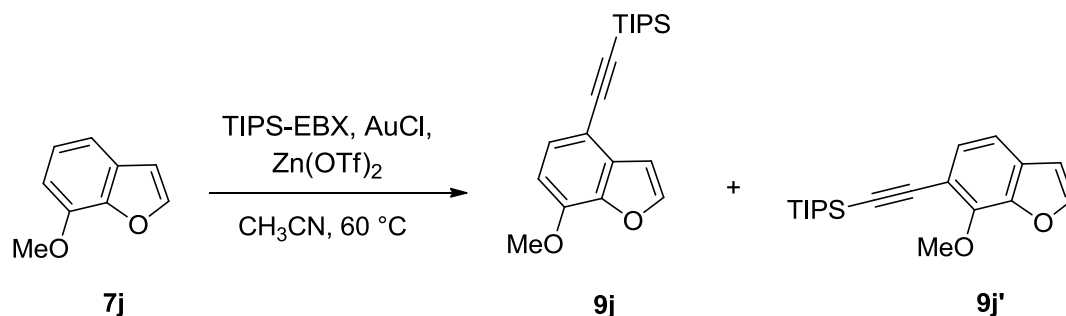

Following the conditions described in **GP**, the crude product was purified by flash column chromatography (SiO<sub>2</sub>; pentane/DCM 100/1) to afford an inseparable mixture of two isomers **9j** and **9j'** as yellow oil (66 mg, 0.20 mmol, 50%).

*R<sub>f</sub>* (pentane/DCM 100/1): 0.5.

<sup>1</sup>H NMR (400 MHz, CDCl<sub>3</sub>) δ 7.60 (d, 0.2 H, *J* = 2.1 Hz, *ArH* minor isomer), 7.58 (d, 1 H, *J* = 2.1 Hz, *ArH* major isomer), 7.32 (d, 0.2 H, *J* = 8.3 Hz, *FuranH*, minor isomer), 7.25 (d, 1 H, *J* = 8.3 Hz, *FuranH*, major isomer), 6.90 (d, 0.2 H, *J* = 2.1 Hz, *ArH* minor isomer), 6.82 (d, 1 H, *J* = 2.1 Hz, *ArH* major isomer), 6.67 (d, 0.2 H, *J* = 8.3 Hz, *FuranH*, minor isomer), 6.66 (d, 1 H, *J* = 8.3 Hz, *FuranH*, major isomer), 4.03 (s, 0.6 H, *OCH*<sub>3</sub>, minor isomer), 4.02 (s, 3 H, *OCH*<sub>3</sub>, major isomer), 1.16 (s, 21 H, *TIPS*, major isomer), 1.13 (s, 4 H, *TIPS*, minor isomer). <sup>13</sup>C NMR (151 MHz, CDCl<sub>3</sub>) δ 146.8, 145.9, 145.8, 145.4, 143.4, 131.9, 131.4, 129.6, 127.9, 108.5, 106.9, 106.7, 106.5, 106.2, 104.5, 91.9, 89.7, 88.0, 76.1, 73.6, 56.2, 56.1, 29.7, 18.7, 18.6, 11.3. IR 2943 (s), 2865 (s), 2362 (m), 2147 (m), 1619 (m), 1584 (w), 1497 (s), 1464 (m), 1407 (w), 1336 (w), 1289 (s), 1258 (w), 1199 (w), 1176 (w), 1093 (m), 1044 (m), 915 (w), 882 (m). HRMS (ESI) calcd for C<sub>20</sub>H<sub>29</sub>O<sub>2</sub>Si<sup>+</sup> [*M*+H]<sup>+</sup> 329.1931; found 329.1928.

**2-((Triisopropylsilyl)ethynyl)-9-methoxy-7H-furo[3,2-*g*]chromen-7-one (10)**

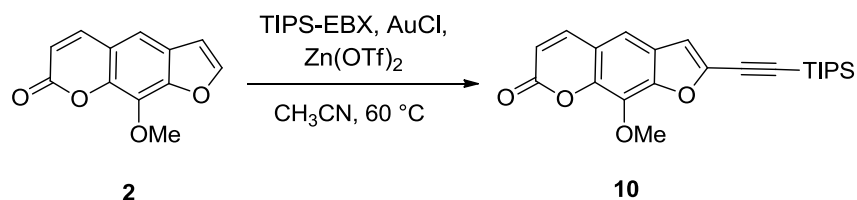

Following the conditions described in **GP**, the crude product was purified by flash column chromatography (SiO<sub>2</sub>; pentane/EA 10/1) to afford **10** as yellow oil (58 mg, 0.15 mmol, 37%).

$R_f$  (pentane/EA 10/1): 0.7.

$^1\text{H}$  NMR (400 MHz,  $\text{CDCl}_3$ )  $\delta$  8.22 (d, 1 H,  $J = 9.7$  Hz, *VinylH*), 7.71 (s, 1 H, *FuranH*), 6.94 (s, 1 H, *ArH*), 6.45 (d, 1 H,  $J = 9.7$  Hz, *VinylH*), 4.33 (s, 3 H,  $\text{CH}_3$ ), 1.18 (m, 21 H, *TIPS*).  $^{13}\text{C}$  NMR (101 MHz,  $\text{CDCl}_3$ )  $\delta$  160.1, 146.9, 146.4, 142.9, 142.3, 133.4, 129.3, 117.8, 115.4, 106.9, 106.7, 100.4, 100.1, 61.4, 18.7, 11.2. IR 2944 (w), 2866 (w), 2146 (w), 1742 (s), 1587 (m), 1473 (m), 1423 (w), 1380 (w), 1310 (w), 1134 (s), 1046 (s), 1028 (w), 916 (w), 830 (w), 814 (w). HRMS (ESI) calcd for  $\text{C}_{23}\text{H}_{28}\text{NaO}_4\text{Si}^+$   $[\text{M}+\text{Na}]^+$  419.1649; found 419.1657.

### 2-Ethynyl-9-methoxy-7H-furo[3,2-g]chromen-7-one (13)

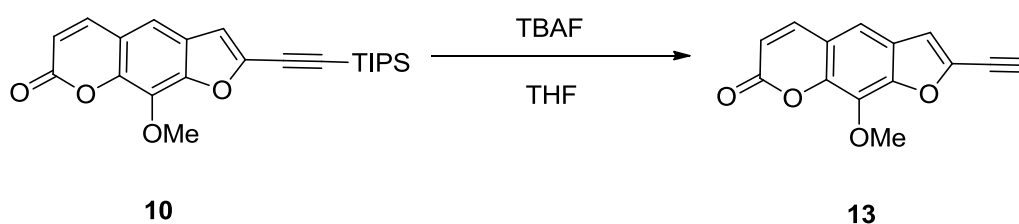

290  $\mu\text{L}$  TBAF (1M in THF, 0.29 mmol, 2.0 equiv) was added into a solution of **10** (53.0 mg, 0.145 mmol, 1.0 equiv) in 2 mL dry THF. The solution was kept overnight then was quenched with sat  $\text{NH}_4\text{Cl}$  (10 mL). The aqueous phase was extracted with DCM ( $3 \times 5$  mL). The combined organic phase was dried over  $\text{MgSO}_4$  and concentrated. The crude product was purified by flash column chromatography ( $\text{SiO}_2$ ; Pentane/EA 5/1) to afford **13** as yellow solid. The yellow solid was washed by pentane to get pure compound (8 mg, 0.04 mmol, 26%).

$R_f$ : (pentane/EA 10/1): 0.4

Melting point: 248–249  $^\circ\text{C}$ .

$^1\text{H}$  NMR (400 MHz,  $\text{CDCl}_3$ )  $\delta$  7.75 (d, 1 H,  $J = 9.6$  Hz, *VinylH*), 7.32 (s, 1 H, *ArH*), 7.03 (s, 1 H, *FuranH*), 6.39 (d, 1 H,  $J = 9.6$  Hz, *VinylH*), 4.30 (s, 3 H,  $\text{CH}_3$ ), 3.56 (s, 1 H, *CH*).  $^{13}\text{C}$  NMR (101 MHz,  $\text{CDCl}_3$ )  $\delta$  160.1, 147.4, 144.1, 144.0, 139.6, 132.5, 125.7, 117.0, 115.2, 113.0, 112.3, 84.7, 73.2, 61.4. IR 3203 (w), 2363 (w), 1713 (s), 1620 (w), 1468 (w), 1400 (w), 1324 (w), 1267 (w), 1237 (w), 1219 (w), 1164 (w), 1021 (w), 962 (w), 936 (w), 874 (w), 815 (m), 776 (w), 760 (w). HRMS (ESI) calcd for  $\text{C}_{14}\text{H}_9\text{O}_4^+$   $[\text{M}+\text{H}]^+$  241.0495; found 241.0491.

### NMR Experiment

TIPS-EBX (**8**, 43 mg, 0.10 mmol) and  $\text{Zn}(\text{OTf})_2$  (36 mg, 0.10 mmol) were mixed in  $\text{CDCl}_3$  (1 mL).

$^1\text{H}$  NMR (400 MHz,  $\text{CDCl}_3$ )  $\delta$  8.58 (m, 1 H, *ArH*), 8.20 (m, 1 H, *ArH*), 7.76 (m, 2 H, *ArH*), 1.18 (m, 21 H, *TIPS*).

TimePrinted:25/7/2013\_11:26:  
27  
title:lyf506-1  
user:  
filename: <lyf506-1>/1  
pulprog: <zg30>  
solvent: <CDCl3>  
NS:8  
Frequency:400.13MHz

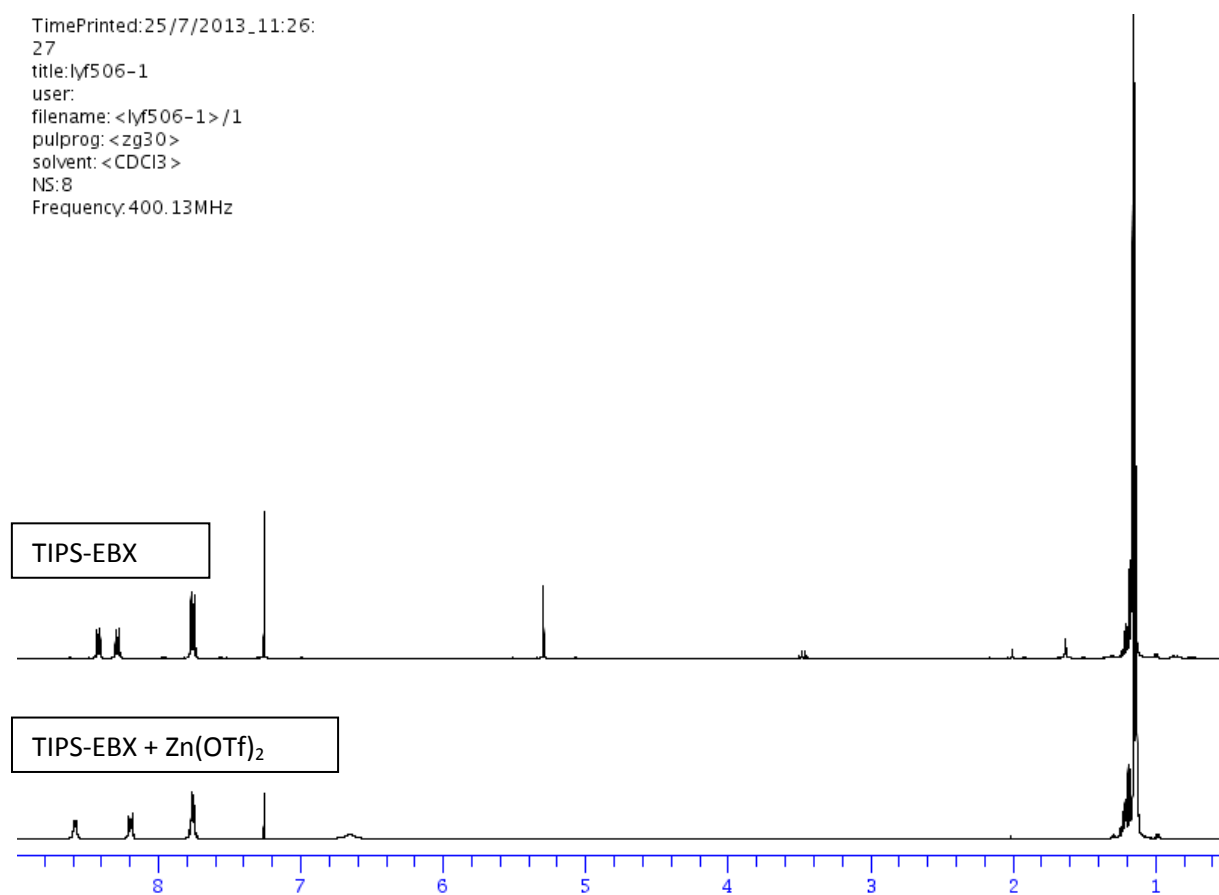

**Figure S1:** <sup>1</sup>H NMR spectrum of Zn(OTf)<sub>2</sub>/TIPS-EBX (**8**) adduct

## 5. Spectra of New Compounds

solvent: <CDCl<sub>3</sub>>  
Frequency: 400.13MHz

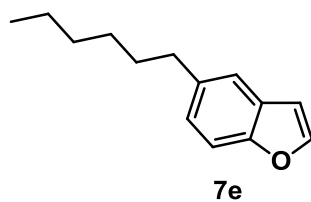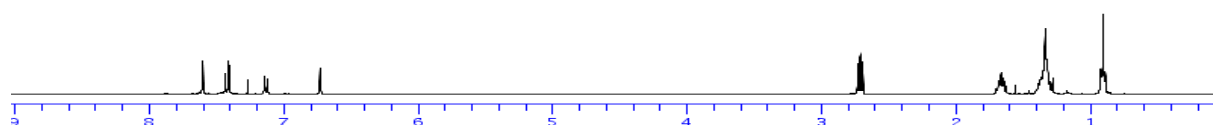

solvent: <CDCl<sub>3</sub>>  
Frequency: 100.612769MHz

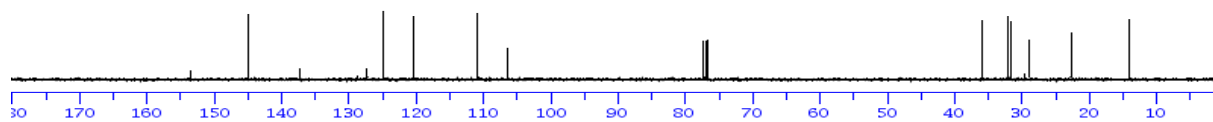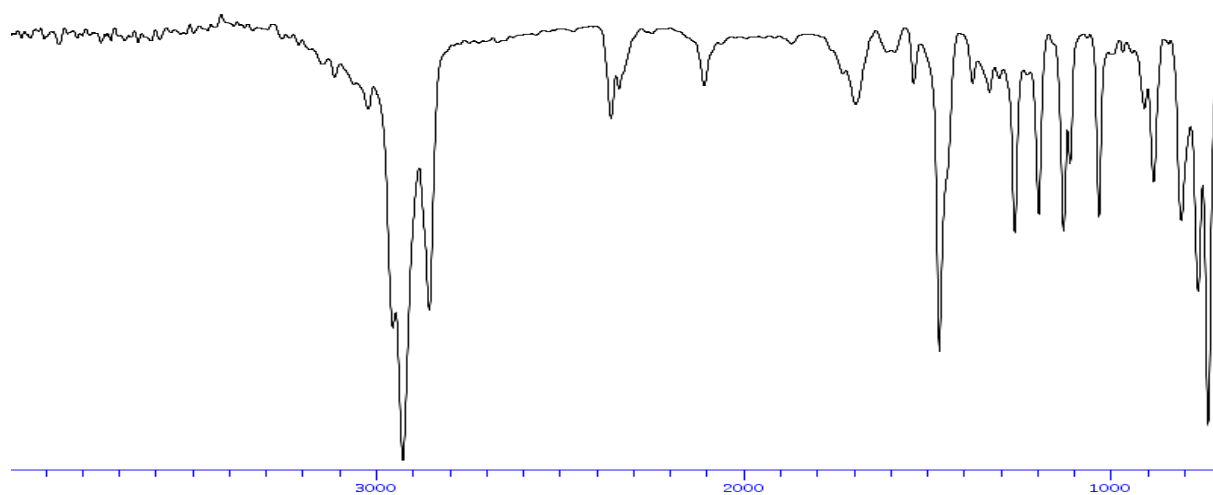

solvent: <CDCl3>  
Frequency: 400.13MHz

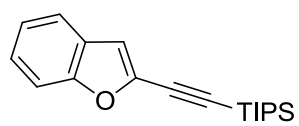

**9a**

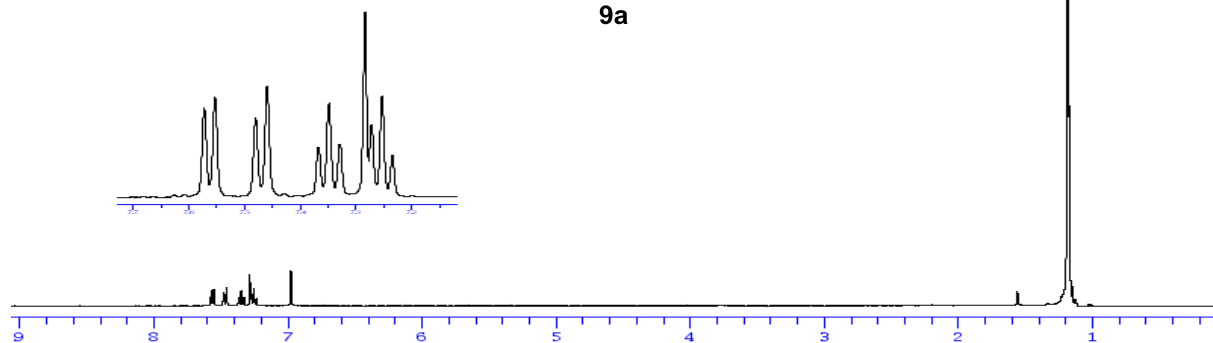

solvent: <CDCl3>  
Frequency: 100.600196MHz

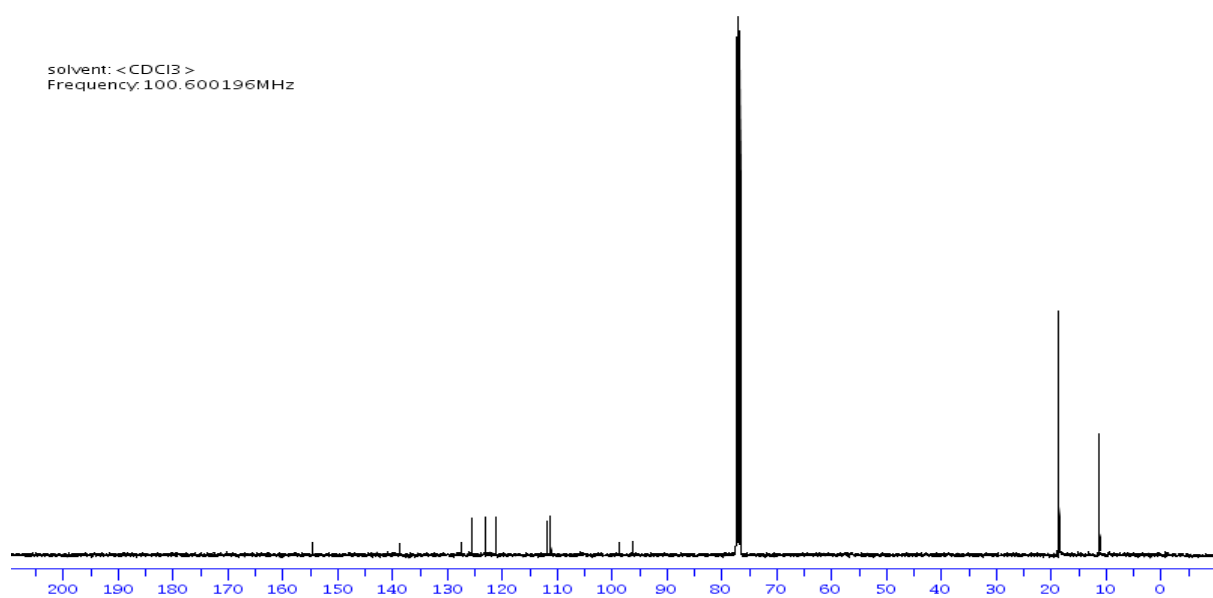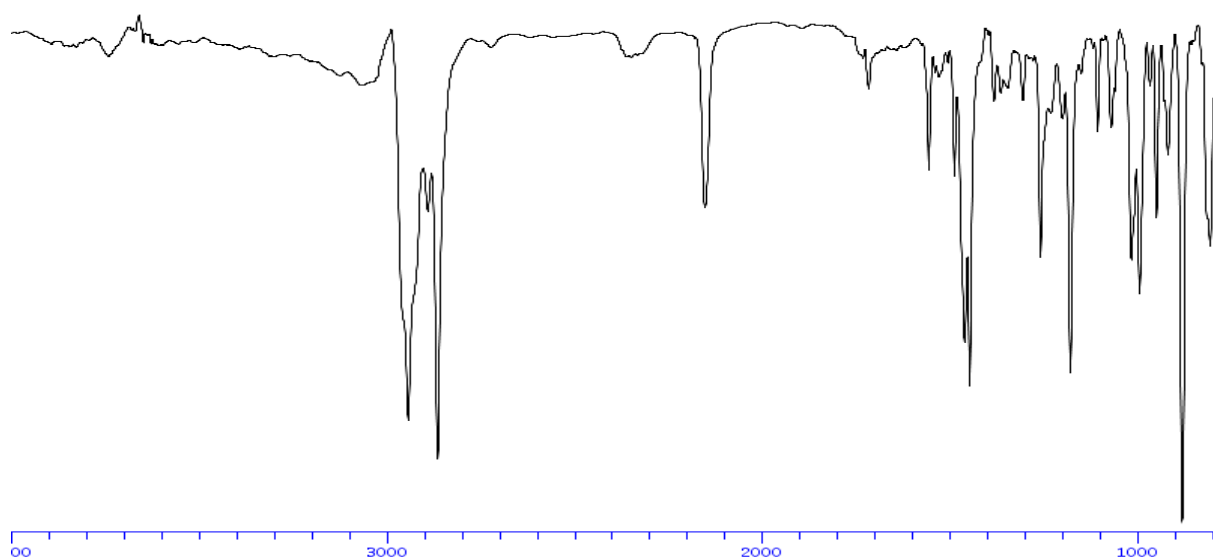

solvent: <CDCl<sub>3</sub>>  
Frequency: 400.13MHz

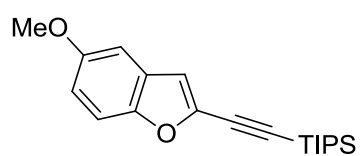

9b

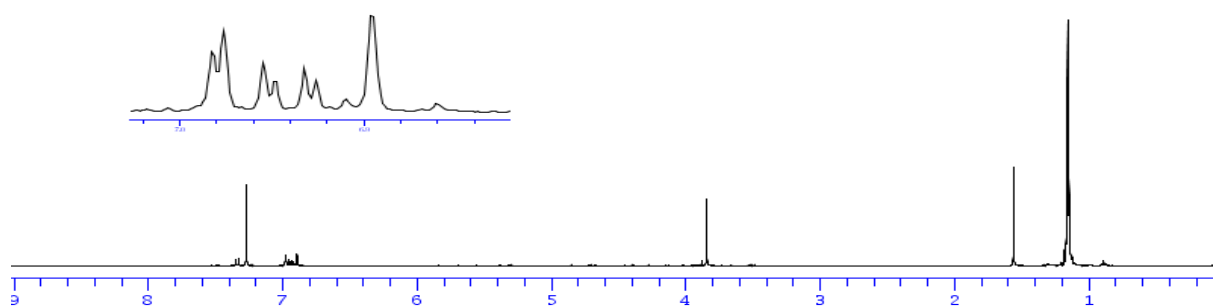

solvent: <CDCl<sub>3</sub>>  
Frequency: 150.902809MHz

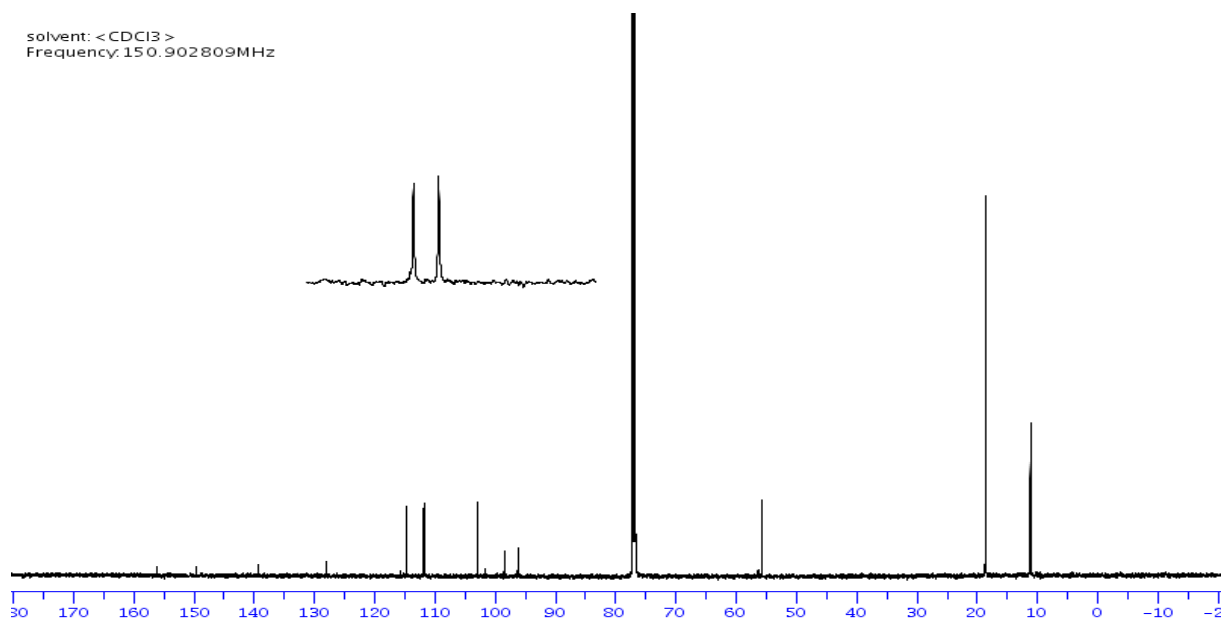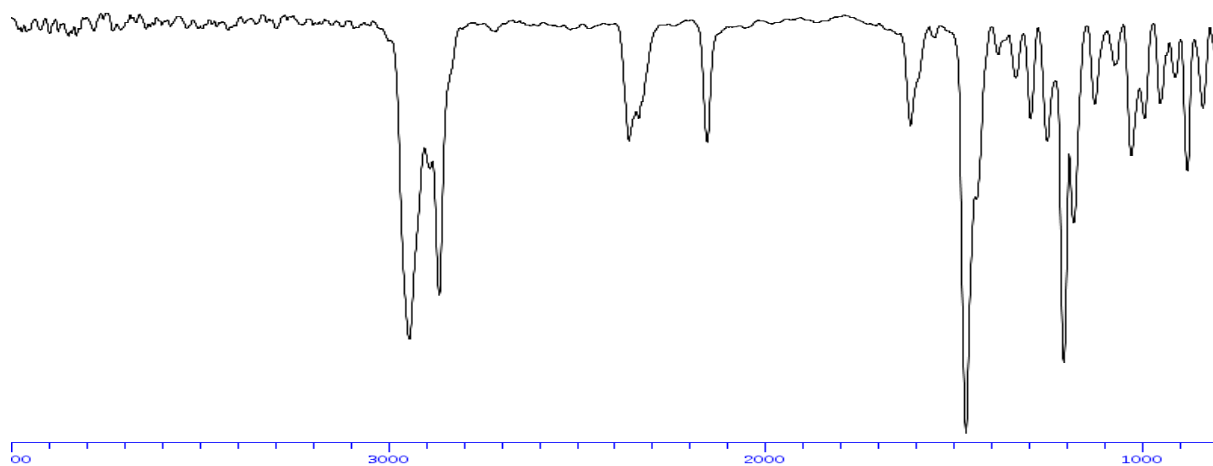



solvent: <CDCl<sub>3</sub>>  
Frequency: 400.13MHz

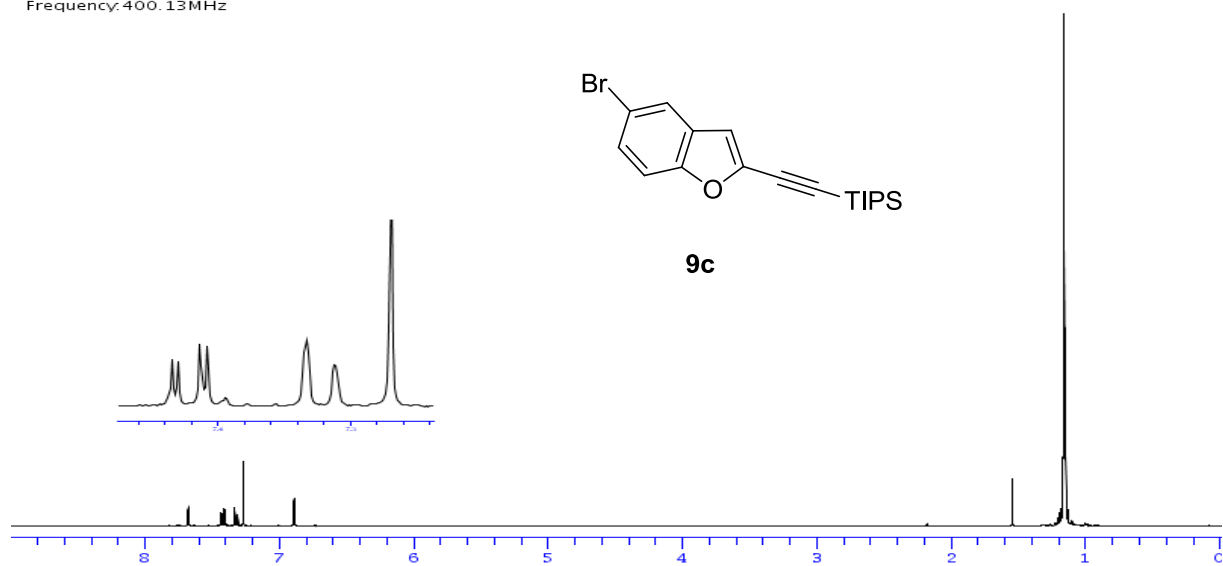

solvent: <CDCl<sub>3</sub>>  
Frequency: 150.902809MHz

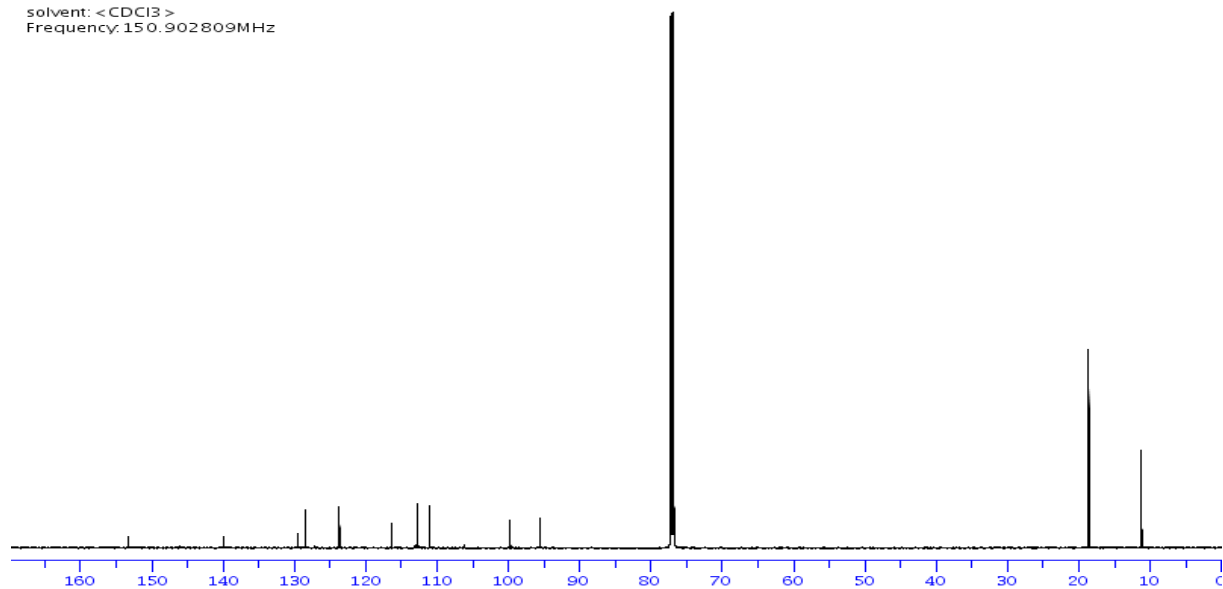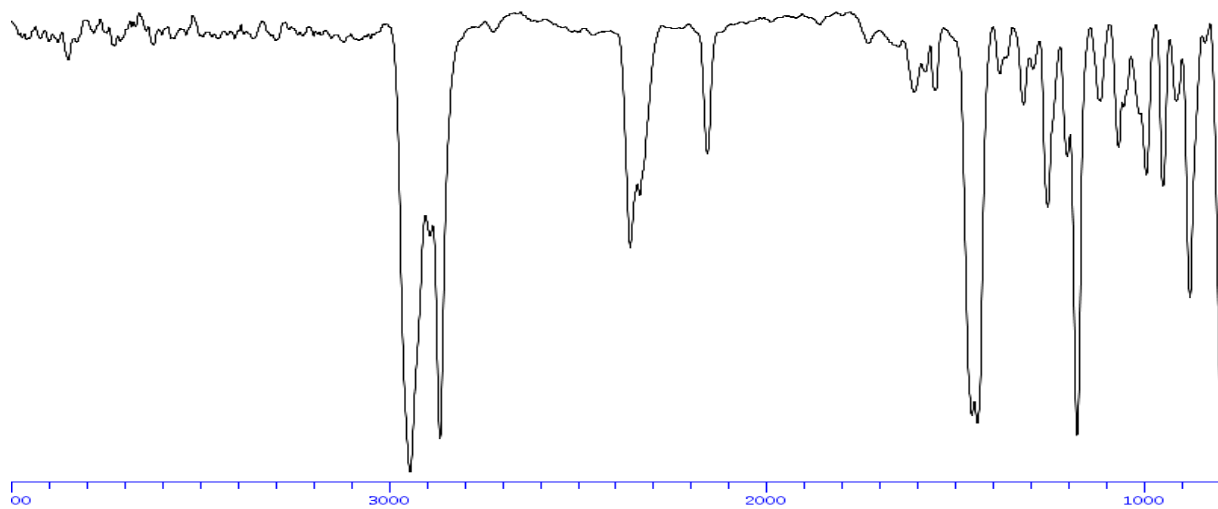

solvent: <CDCl3>  
Frequency: 400.13MHz

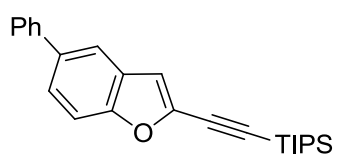

**9d**

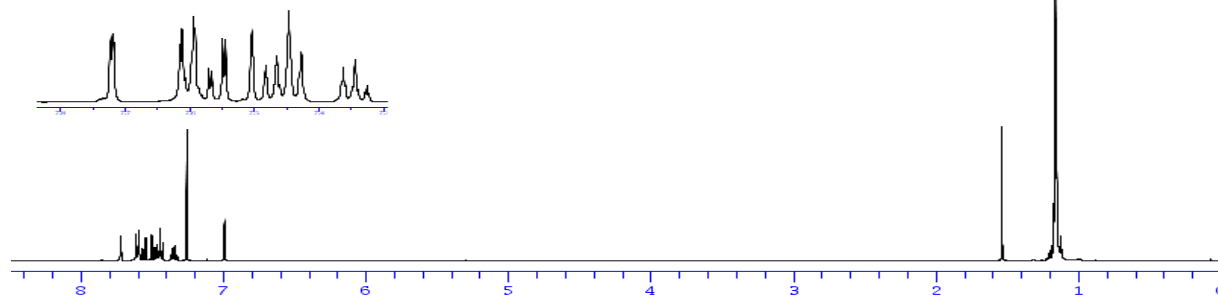

solvent: <CDCl3>  
Frequency: 100.600196MHz

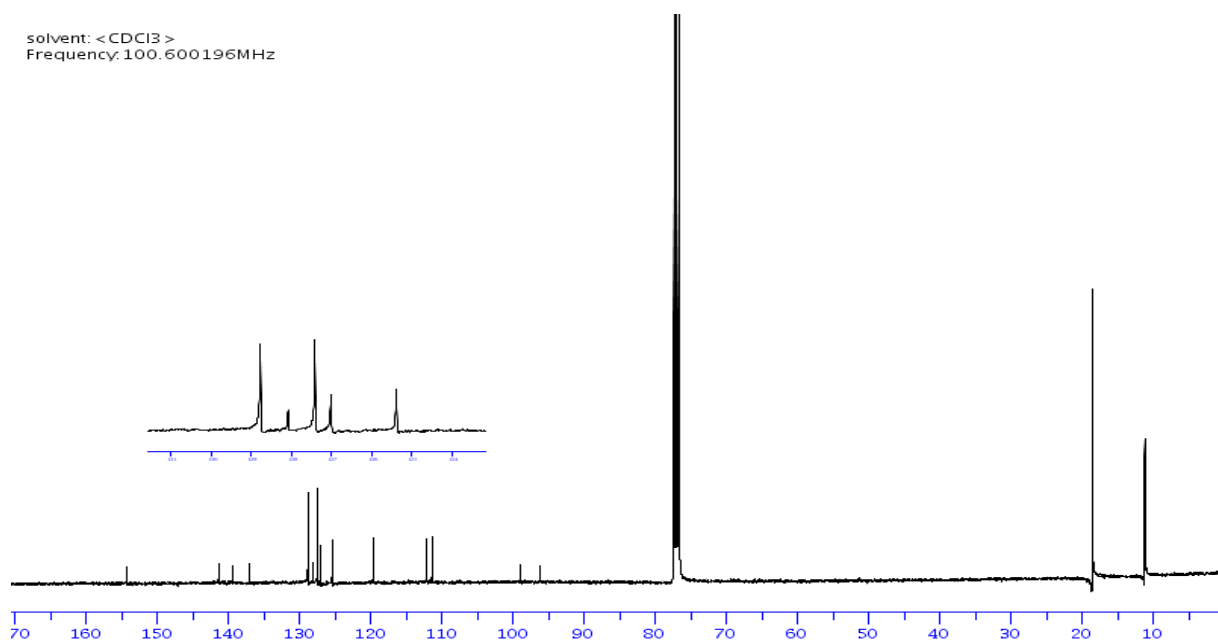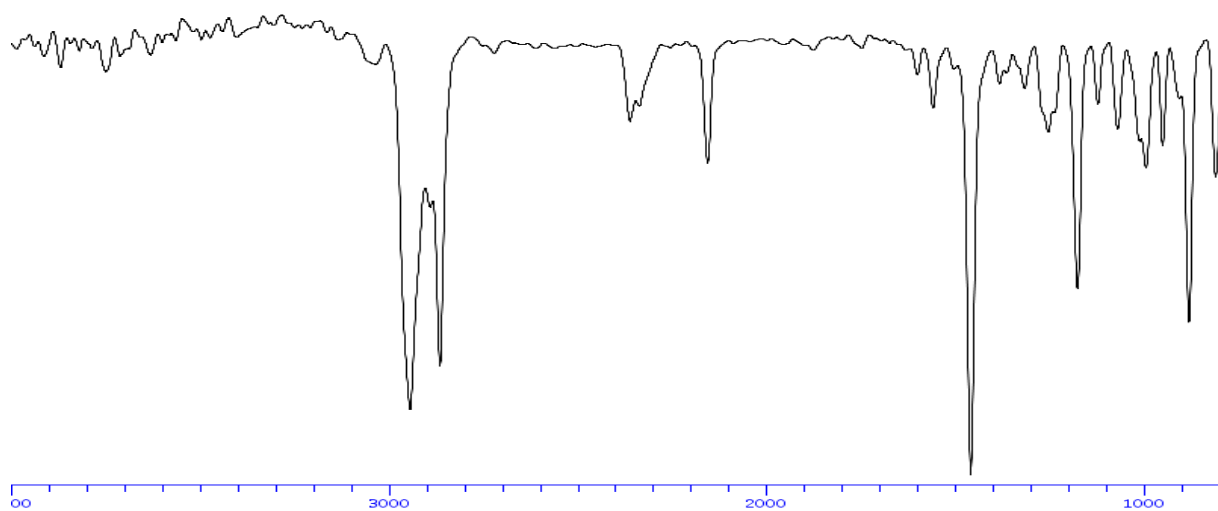

solvent: <CDCl3>  
Frequency: 400.13MHz

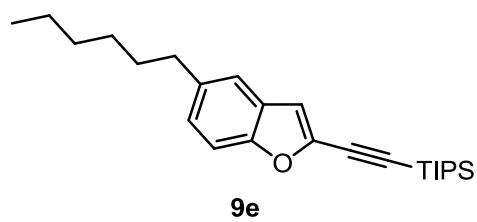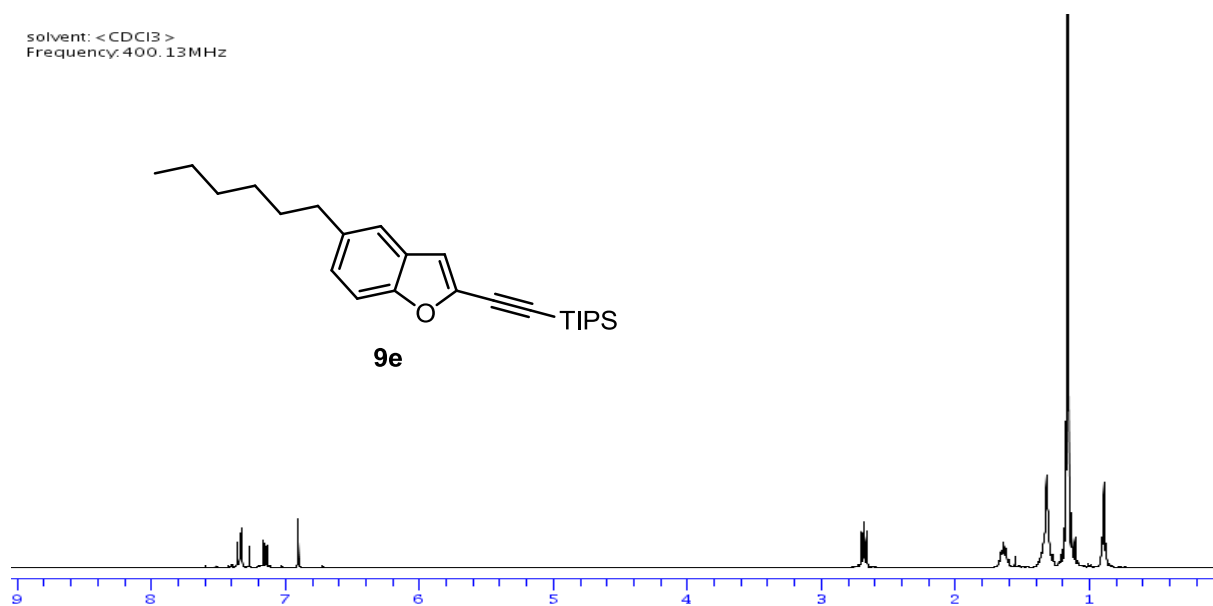

solvent: <CDCl3>  
Frequency: 100.612769MHz

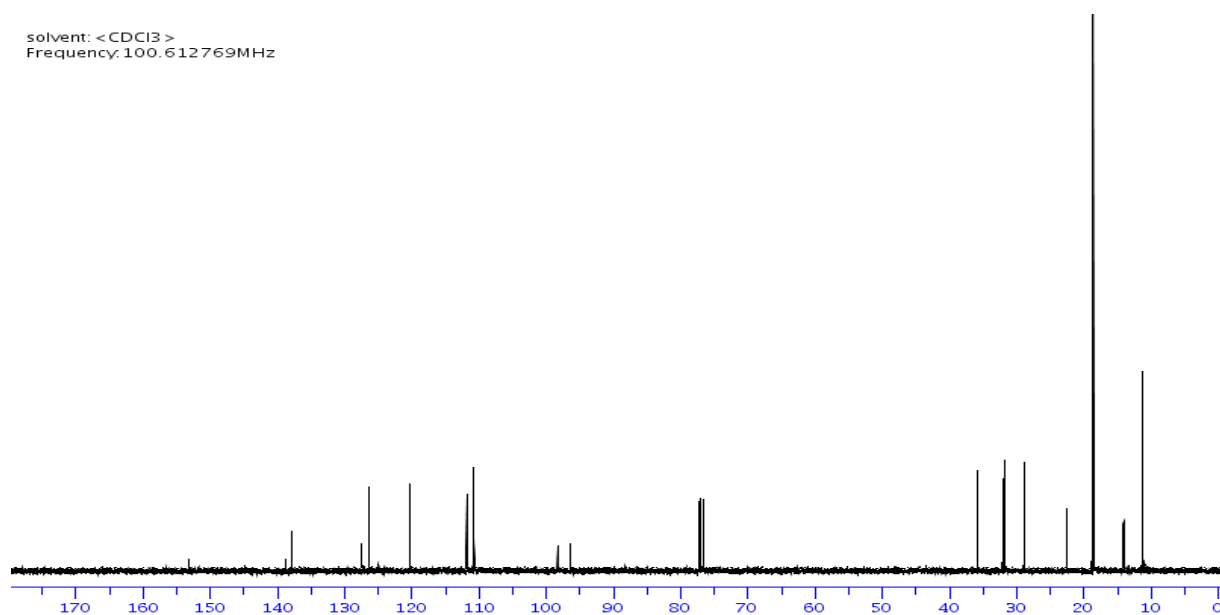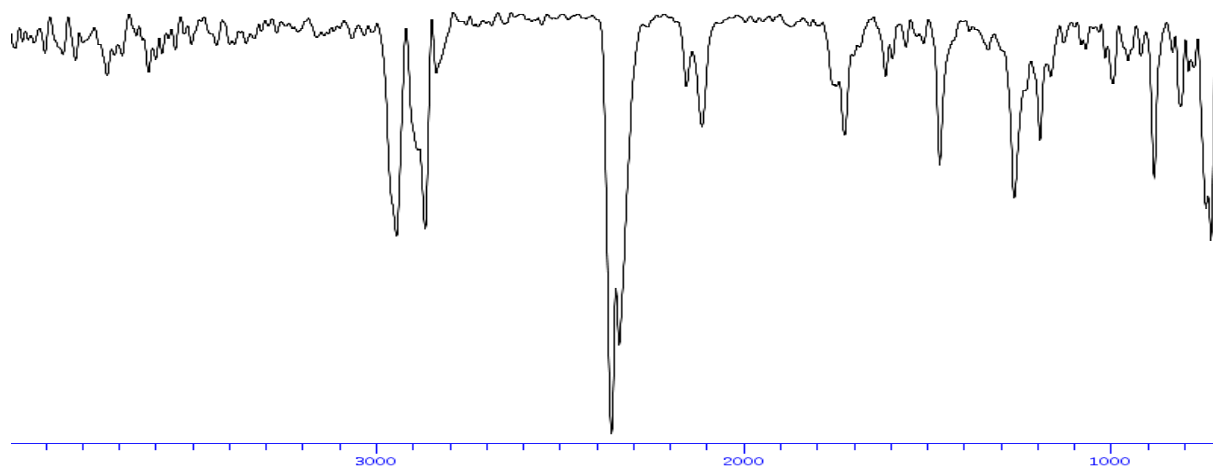

solvent: <CDCl<sub>3</sub>>  
Frequency: 400.08MHz

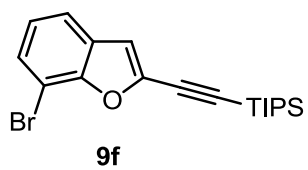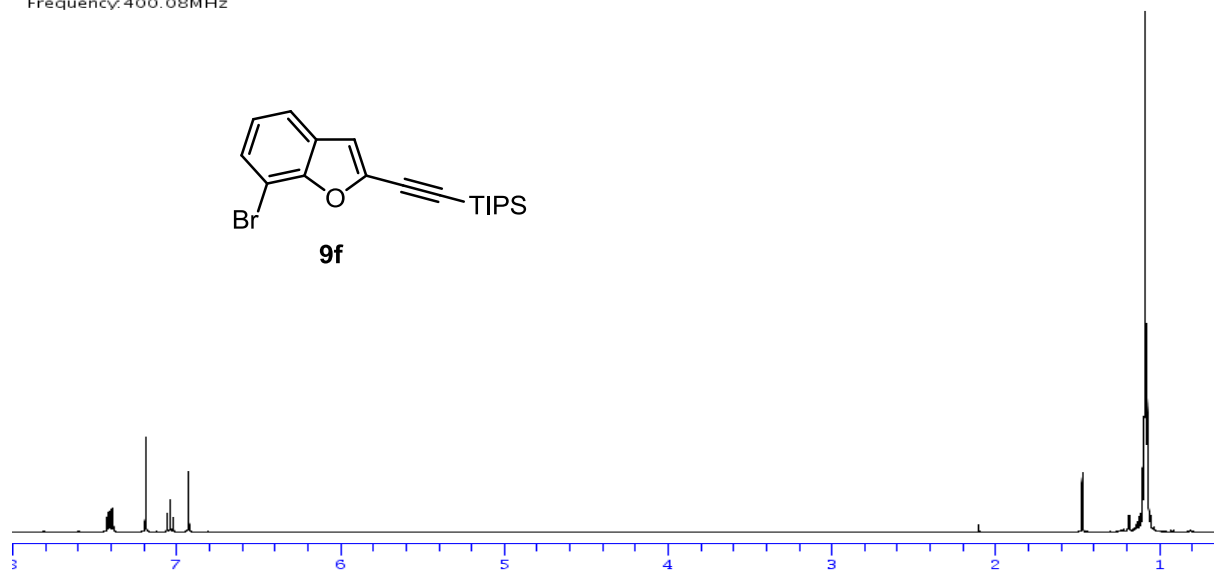

solvent: <CDCl<sub>3</sub>>  
Frequency: 100.600196MHz

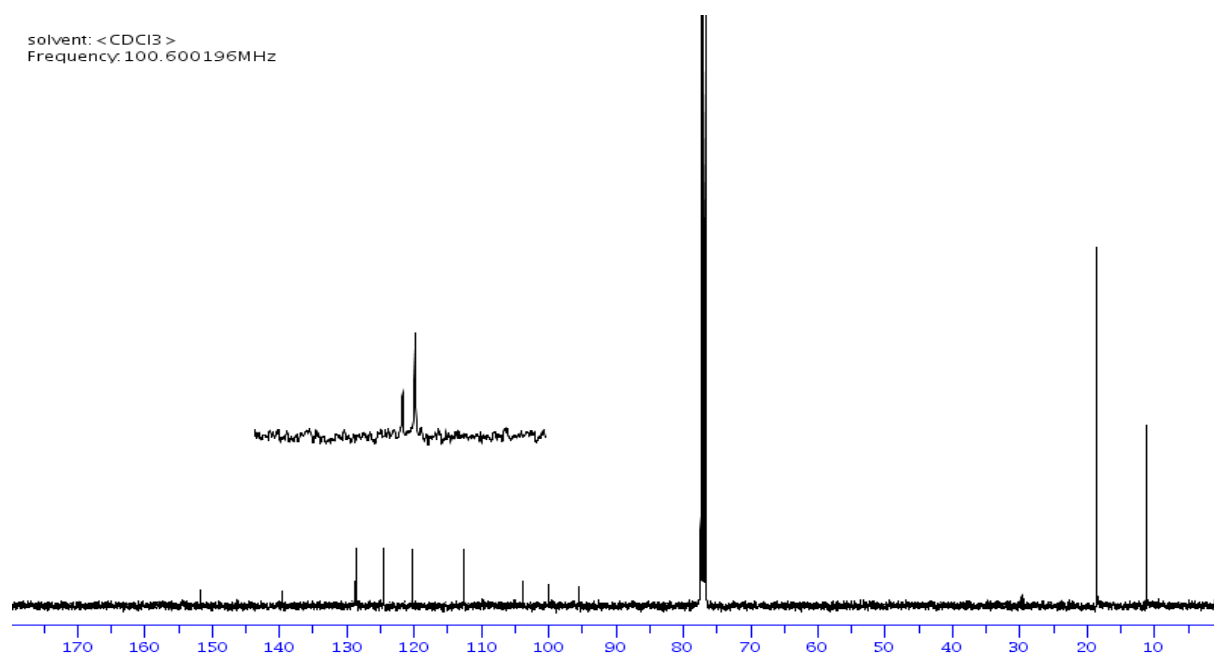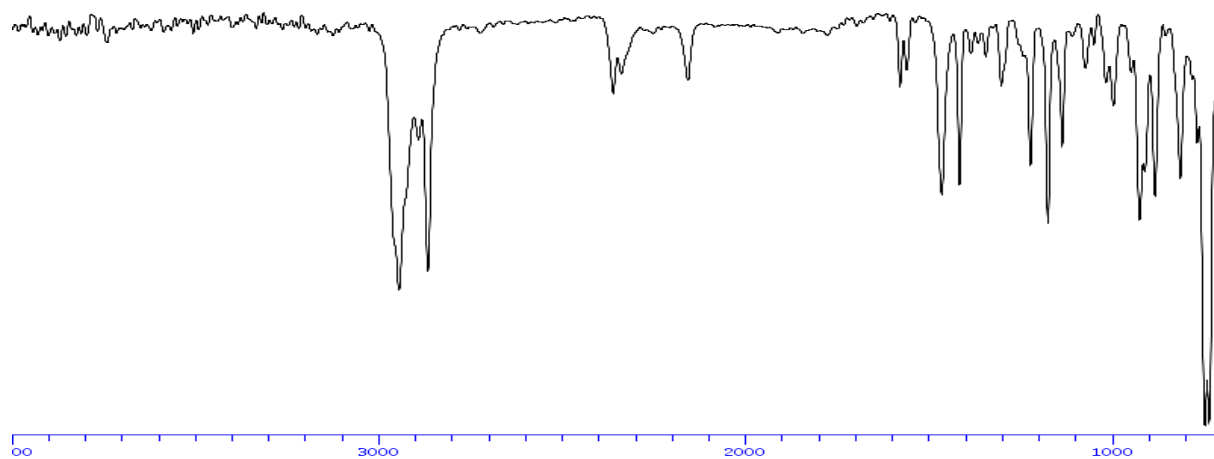

solvent: <CDCl<sub>3</sub>>  
Frequency: 400.13MHz

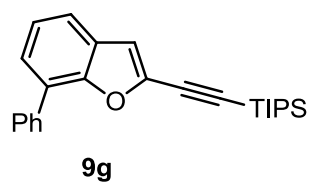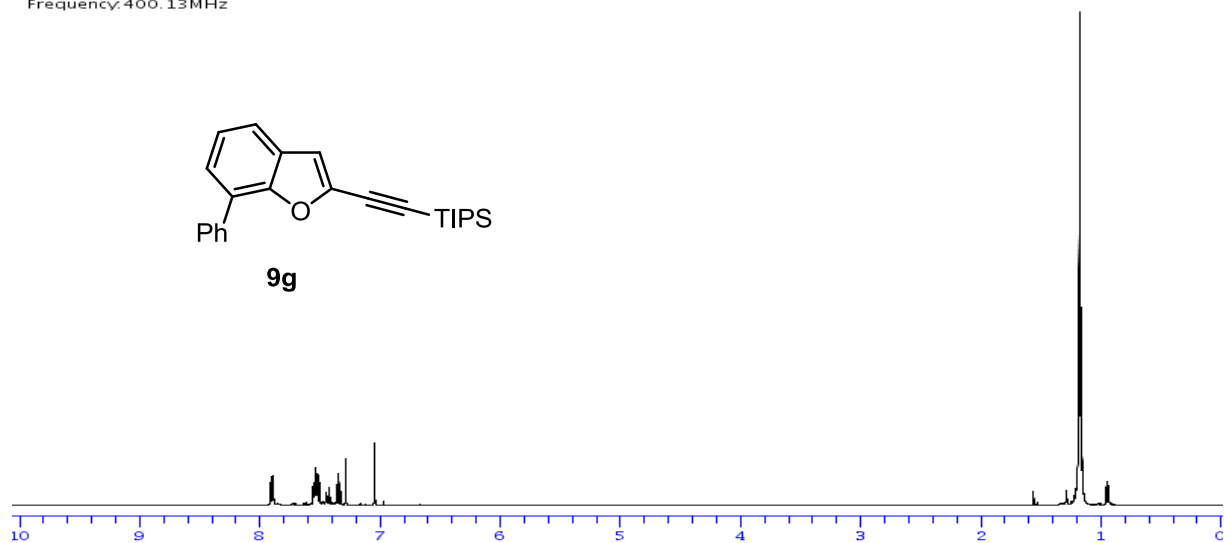

solvent: <CDCl<sub>3</sub>>  
Frequency: 100.600196MHz

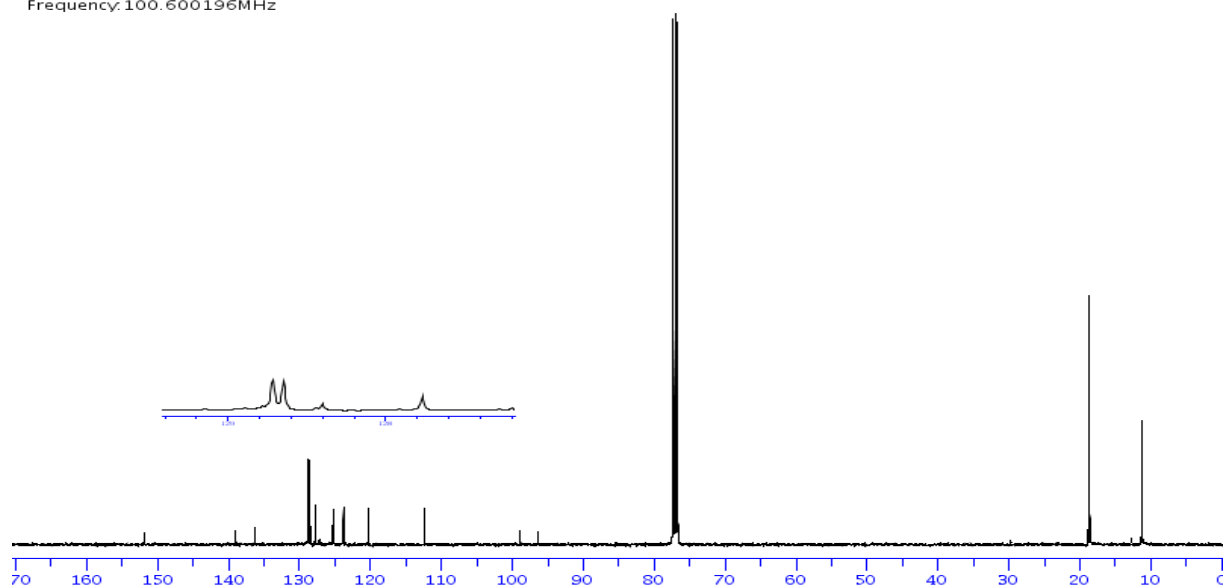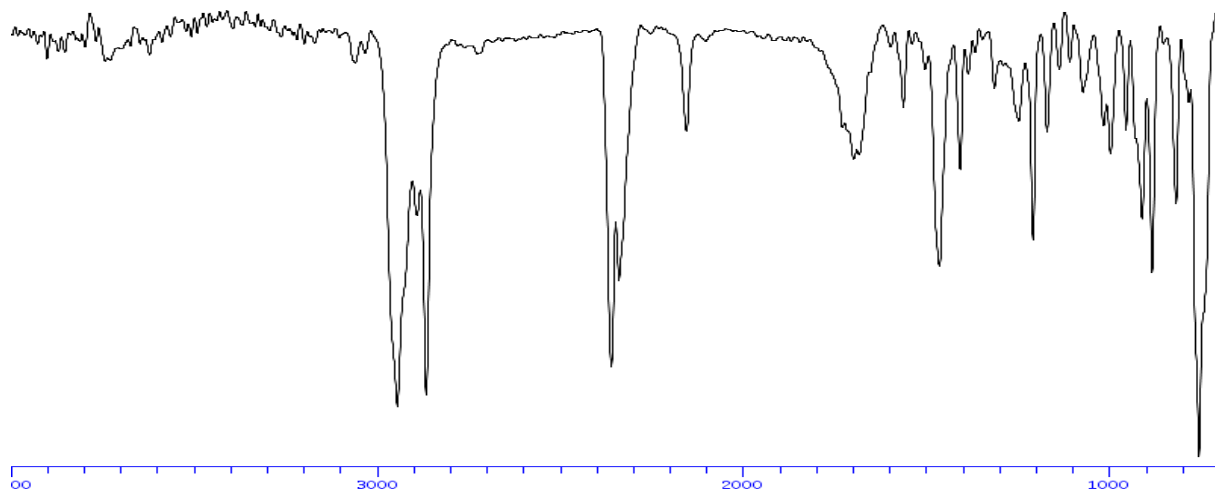

solvent: <CDCl<sub>3</sub>>  
Frequency: 400.13MHz

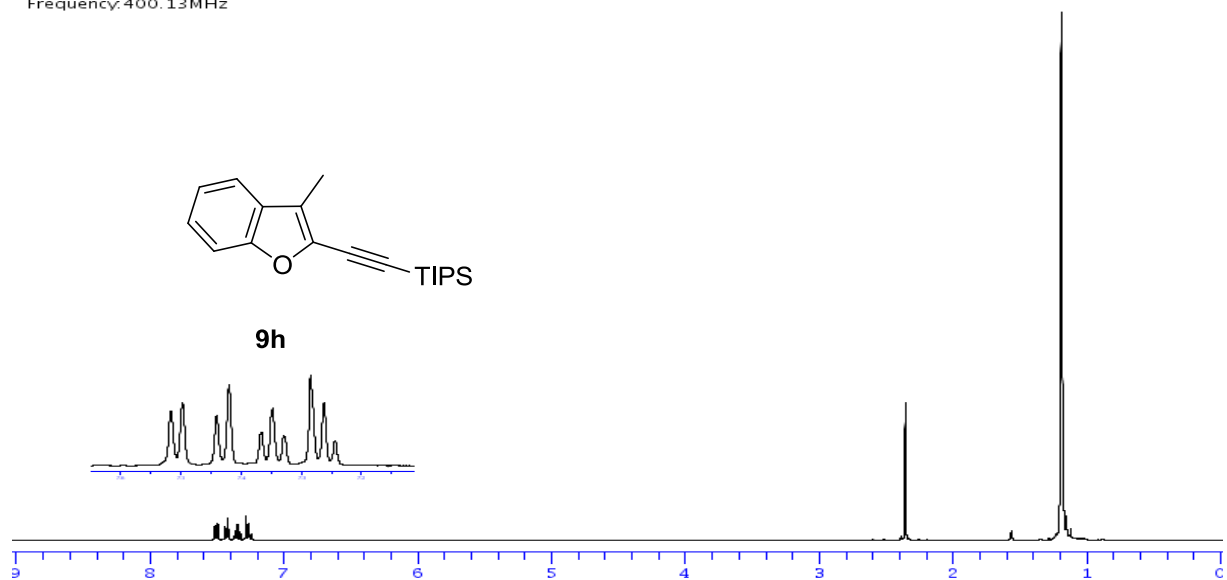

solvent: <CDCl<sub>3</sub>>  
Frequency: 100.600196MHz

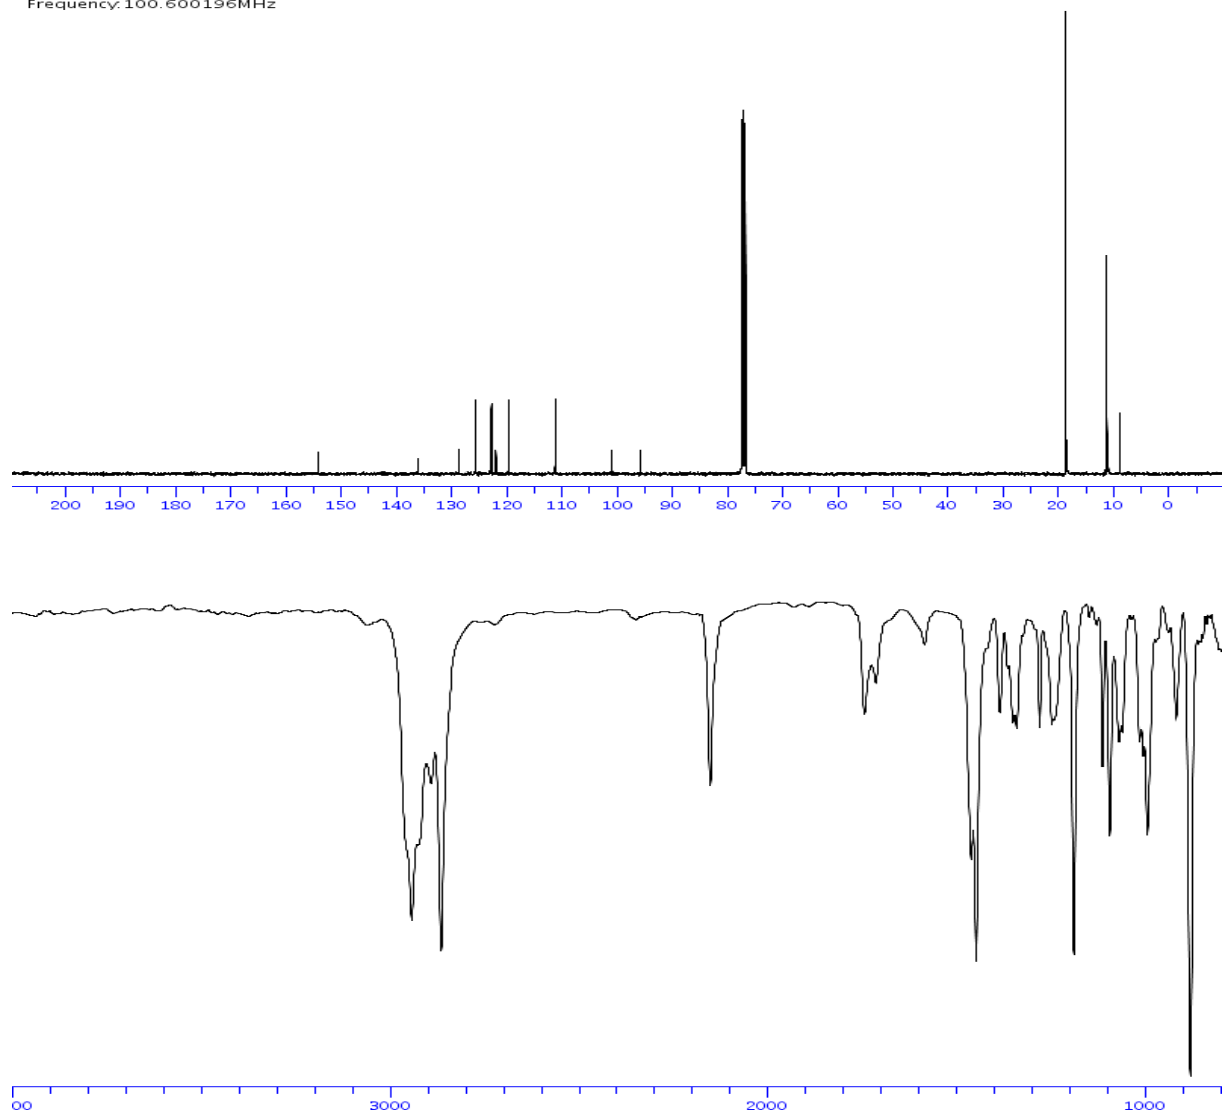

solvent: <CDCl3>  
Frequency: 400.13MHz

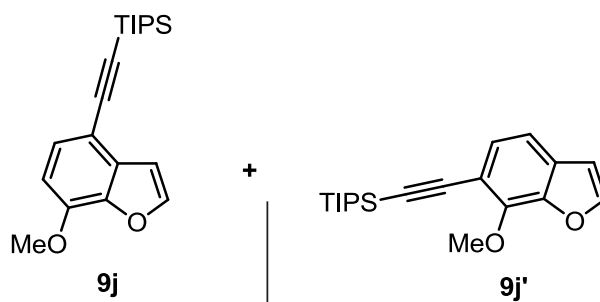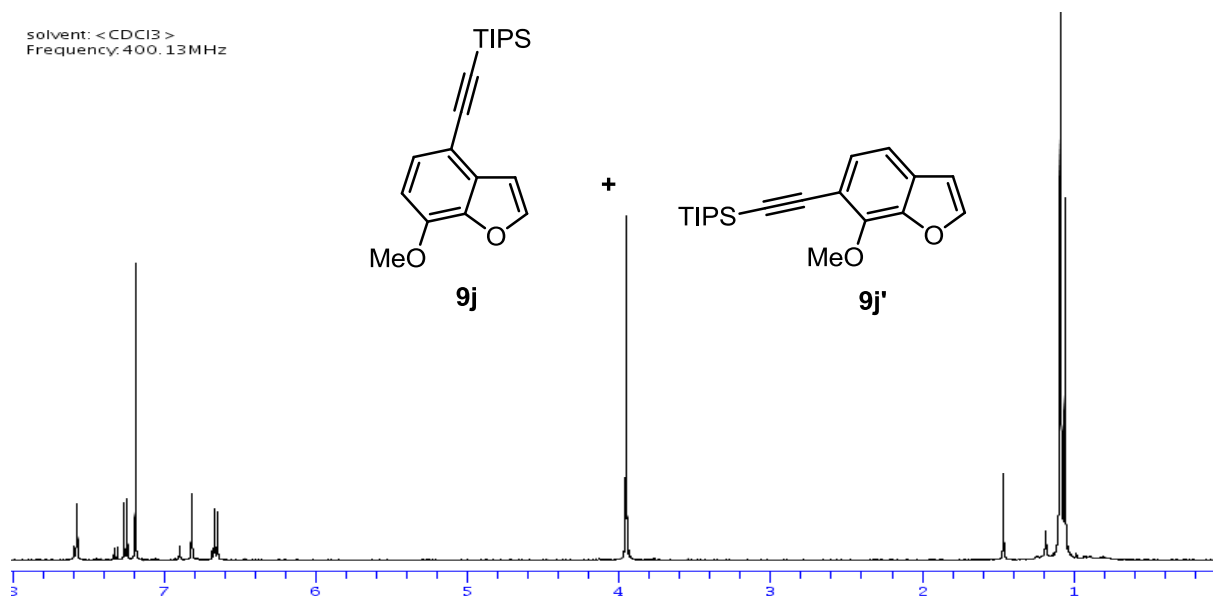

solvent: <CDCl3>  
Frequency: 150.902809MHz

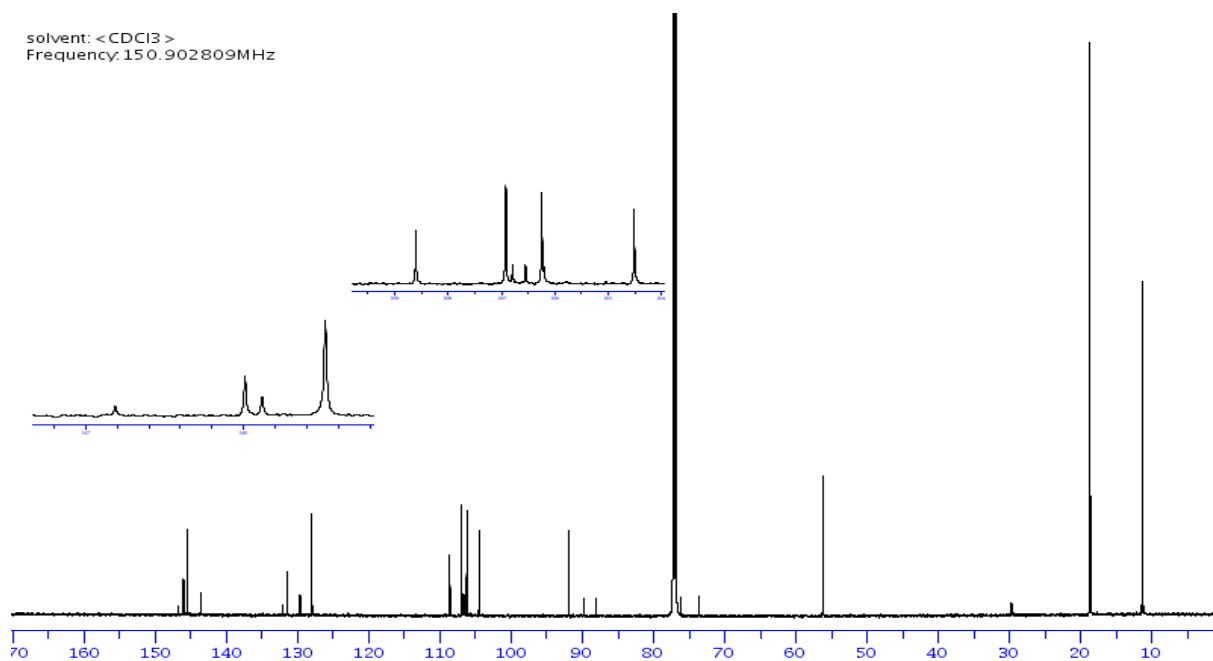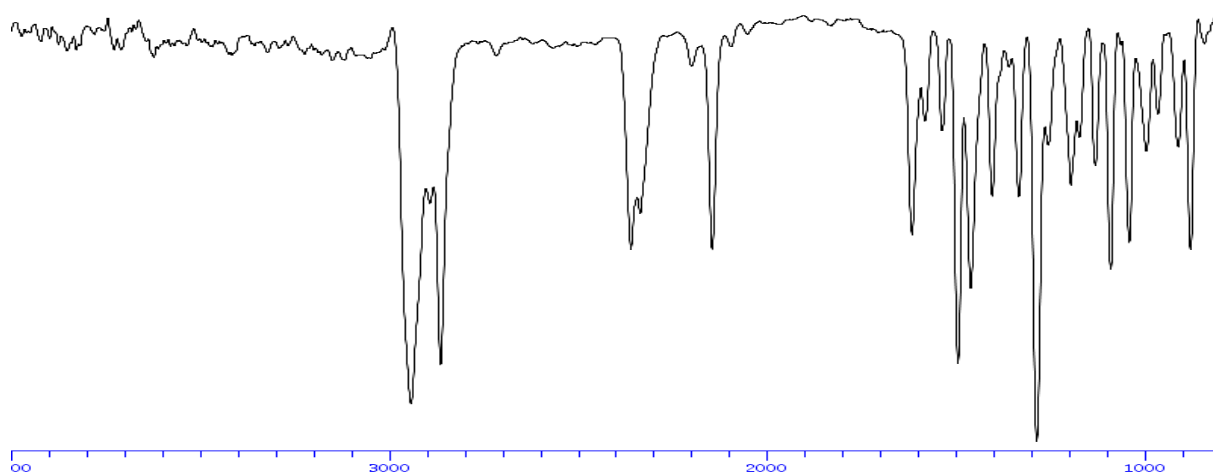

solvent: <CDCl3>  
Frequency: 400.13MHz

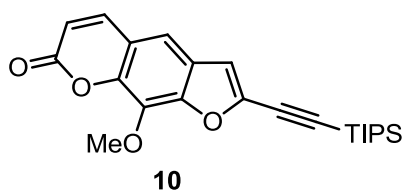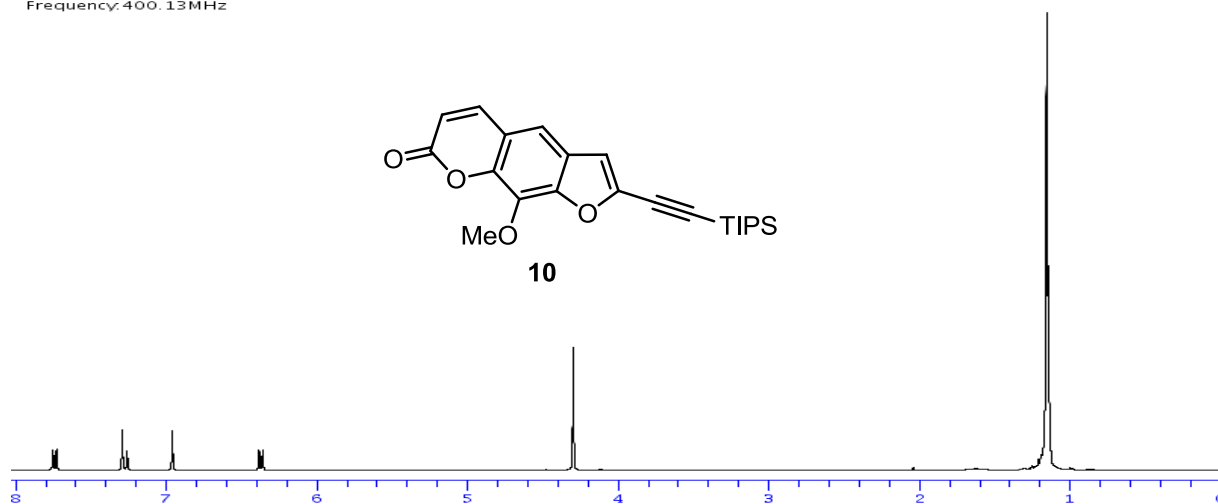

solvent: <CDCl3>  
Frequency: 100.600196MHz

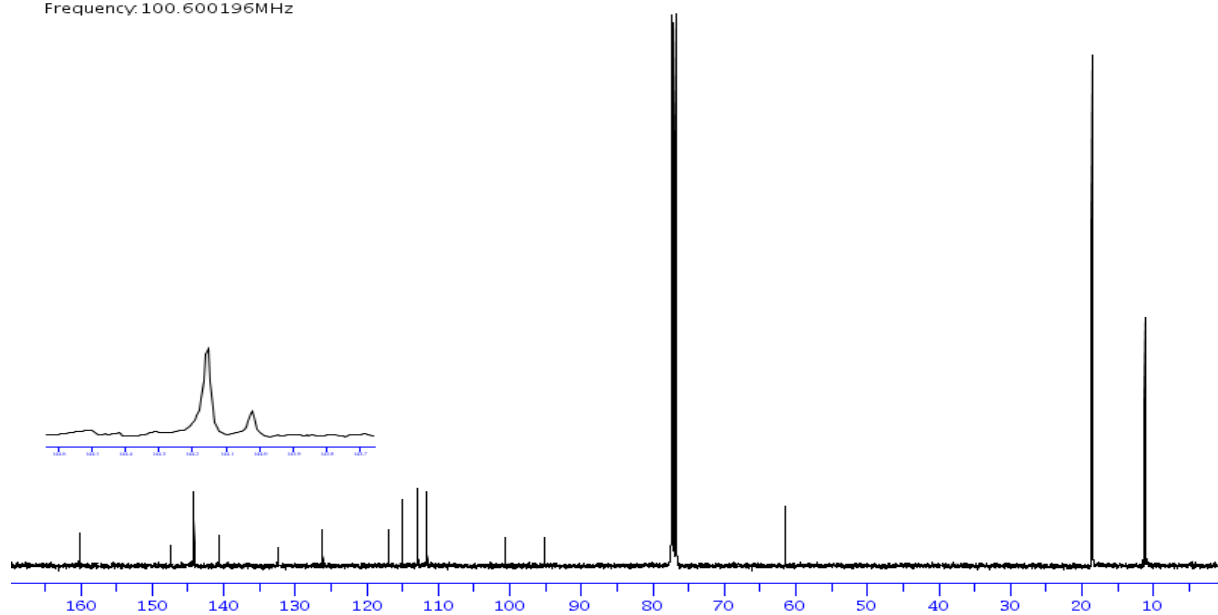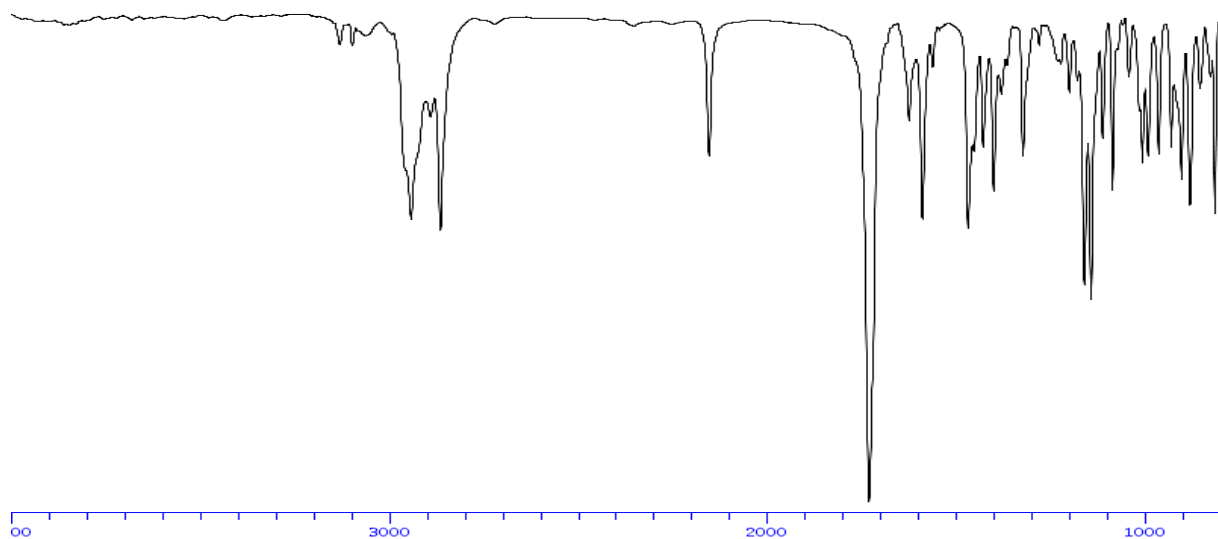



solvent: <CDCl3>  
Frequency: 400.13MHz

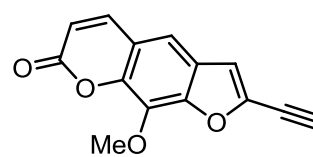

13

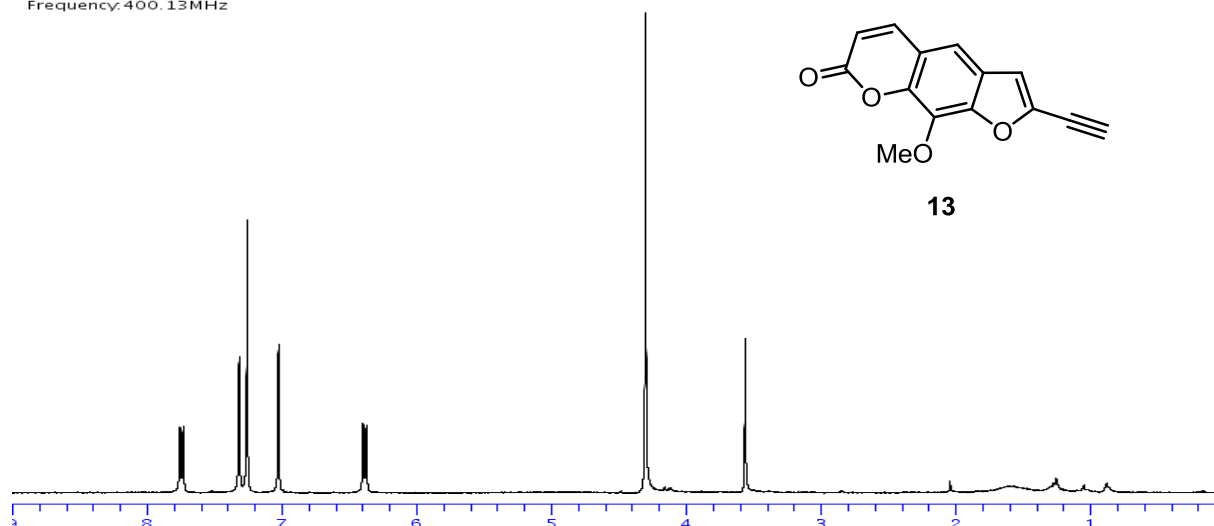

solvent: <CDCl3>  
Frequency: 100.600196MHz

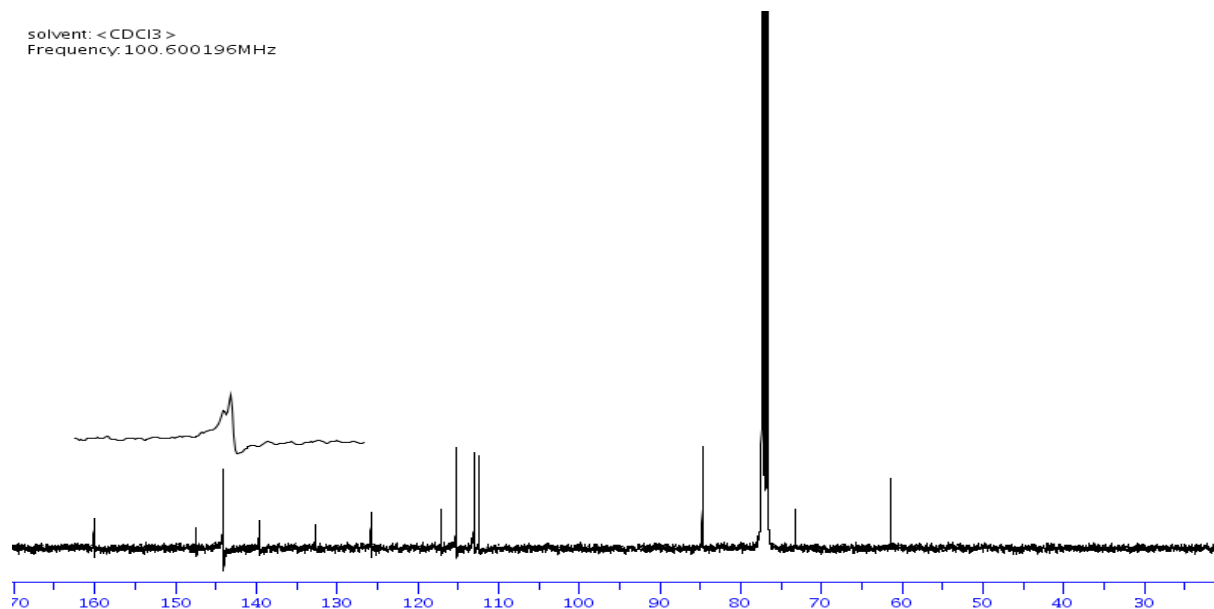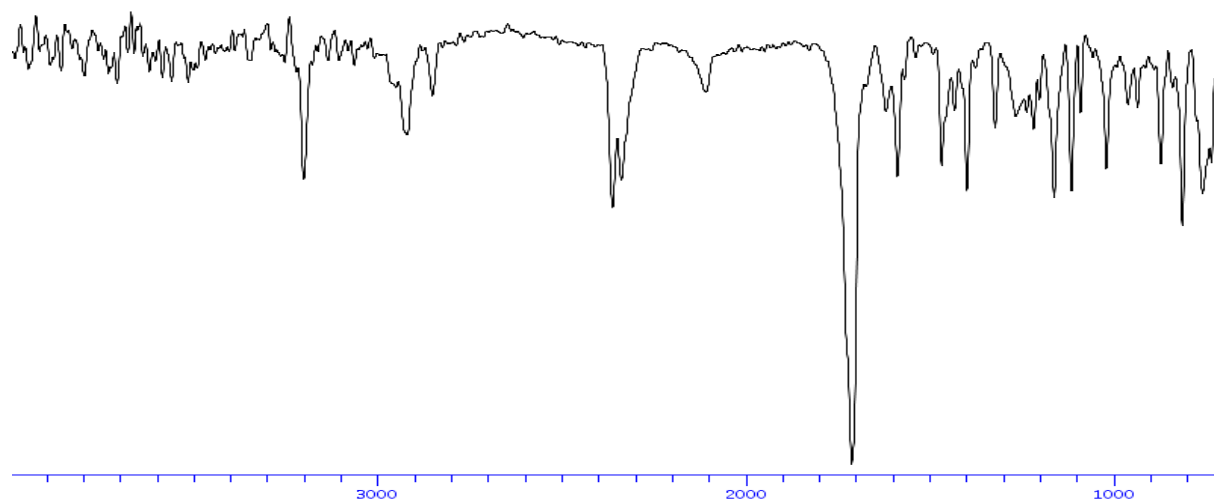

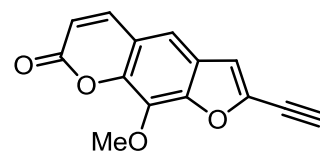

13

solvent: <CDCl<sub>3</sub>>  
Frequency: 400.08MHz

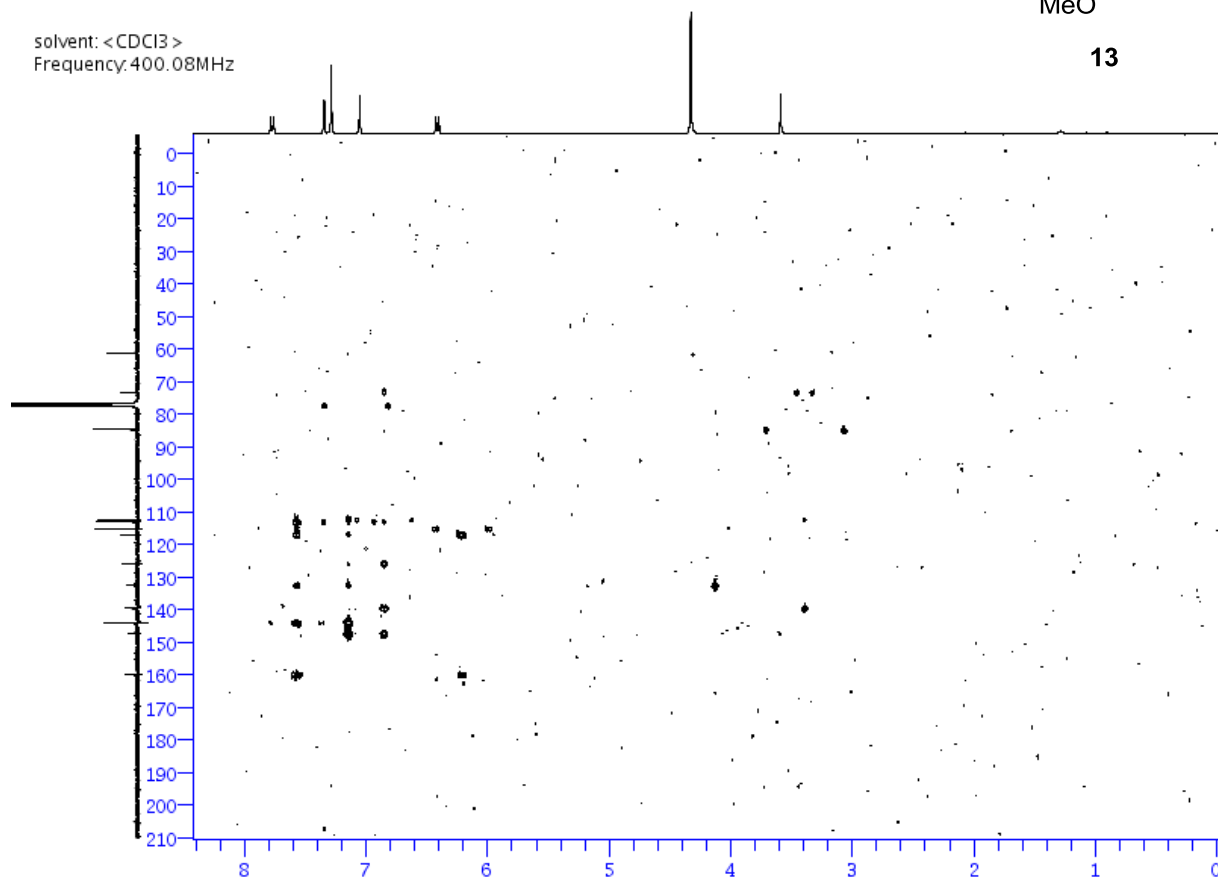

solvent: <CDCl<sub>3</sub>>  
Frequency: 400.08MHz

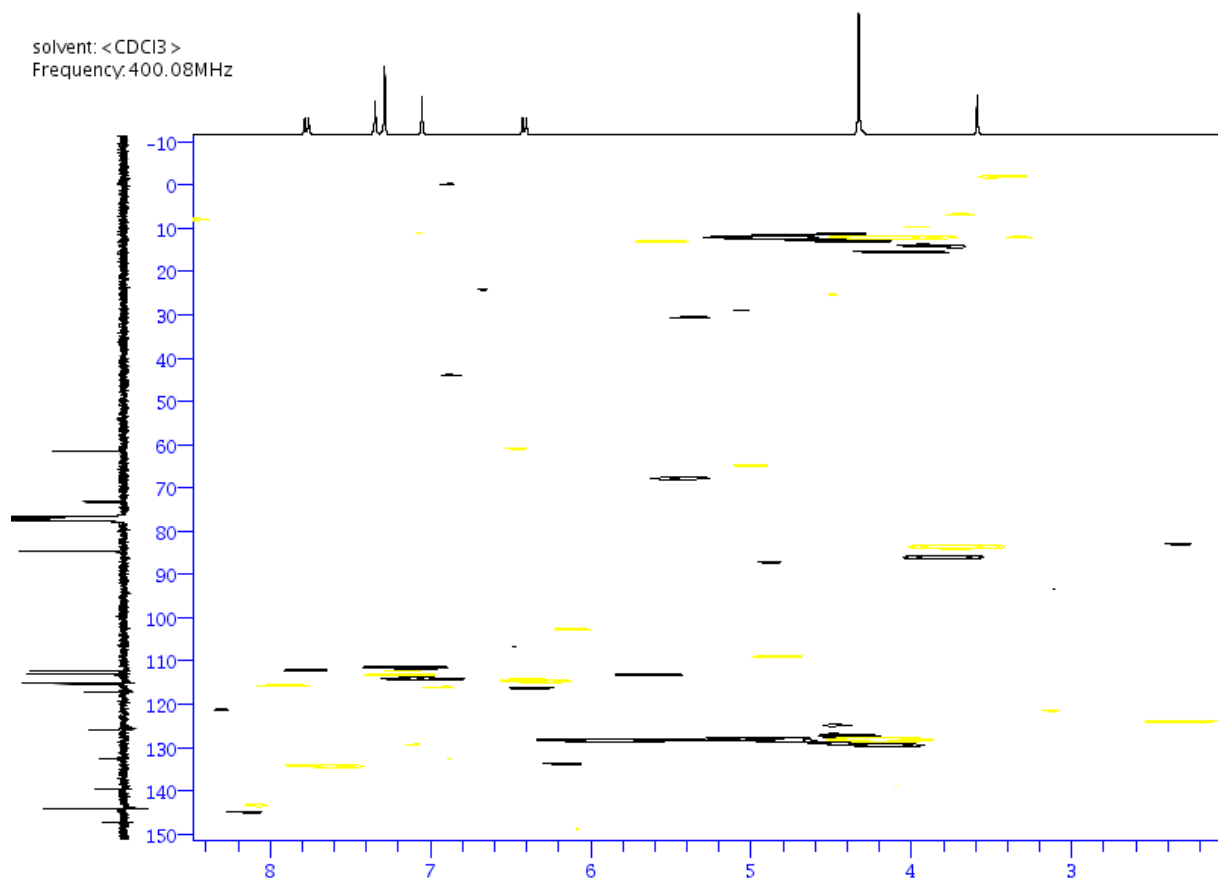

Supplement: Additional file 1 [file 1860-5397-9-204-S1.pdf]
